# Supplementary material
Source: publisher figshare collection journal article supplement (https://acs.figshare.com/ndownloader/files/3796897)
Supplement: Supplementary file 1 [file 3796897]

# Synthesis of Unsupported $d^1$ - $d^x$ Oxido Bridged Heterobimetallic Complexes Containing $V^{IV}$ : A New Direction for Metal-to-Metal Charge Transfer

*Xinyuan Wu, Tao Huang, Travis T. Lekich, Roger D. Sommer, Walter W. Weare\*.*

Department of Chemistry, North Carolina State University, Campus Box 8204, Raleigh, NC,  
27695-8204, USA.

## Table of contents

|                                                       |         |
|-------------------------------------------------------|---------|
| Electronic Absorption Spectra with Molar Absorptivity | S3-S8   |
| Solid State ATR-FTIR Spectra                          | S9-S14  |
| ESI-HRMS Results                                      | S15-S24 |
| Crystallographic Details                              | S25-S34 |
| Electrochemical Experiments                           | S35-S37 |
| Resonance Raman Experiments                           | S38-S39 |

### Electronic Absorption Spectra with Molar Absorptivity

The molar absorptivity was measured in dichloromethane under the protection of nitrogen at room temperature. The  $\epsilon$  of **2c** and **2e** were measured in acetonitrile because of the poor solubility in dichloromethane. The  $\epsilon$  of **2d** could not be obtained due to the low solubility in all common solvents, therefore an EAS spectra of **2d** is reported as a normalized absorbance.

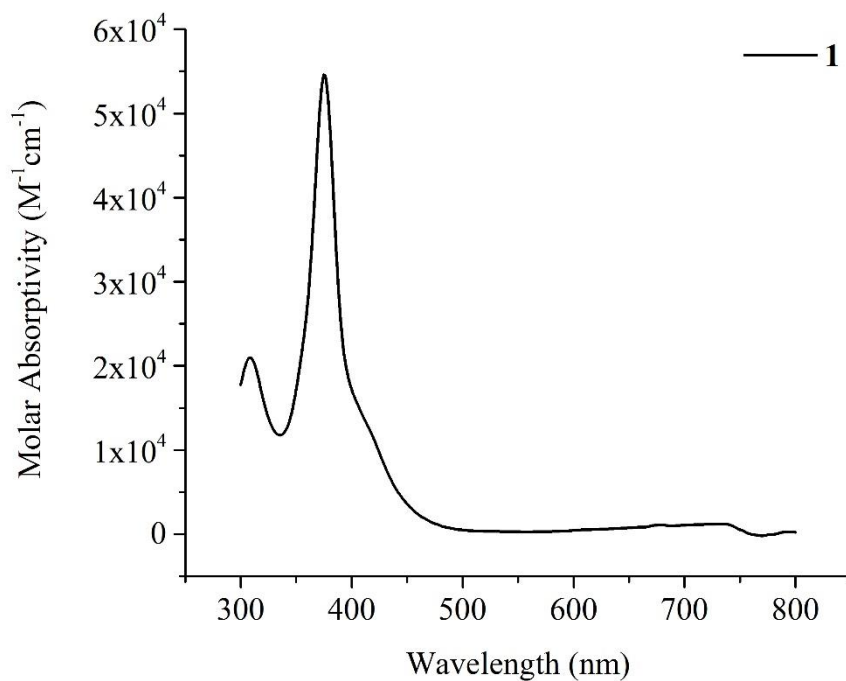

**Figure S1.** Electronic absorption spectrum of (TMTAA)V=O (**1**).

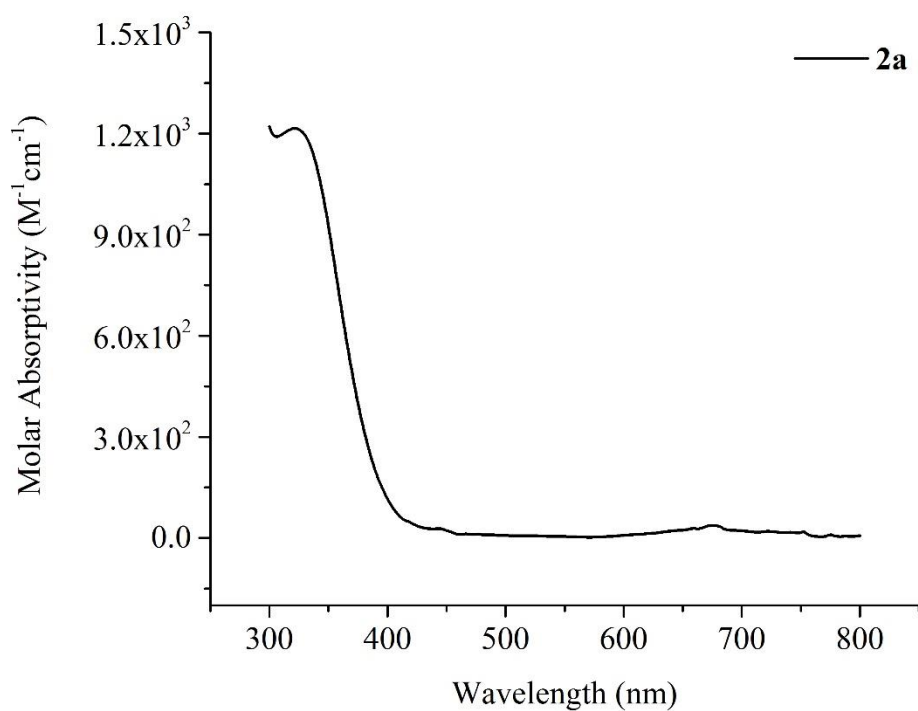

**Figure S2.** Electronic absorption spectrum of  $[Mn(Py_5Me_2)](CF_3SO_3)_2$  (**2a**).

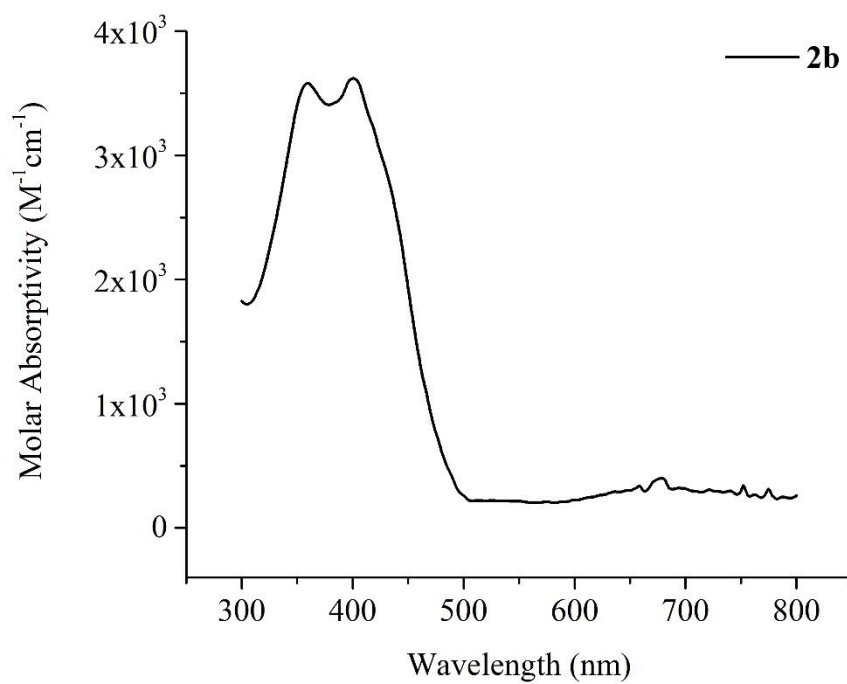

**Figure S3.** Electronic absorption spectrum of  $[Fe(Py_5Me_2)](CF_3SO_3)_2$  (**2b**).

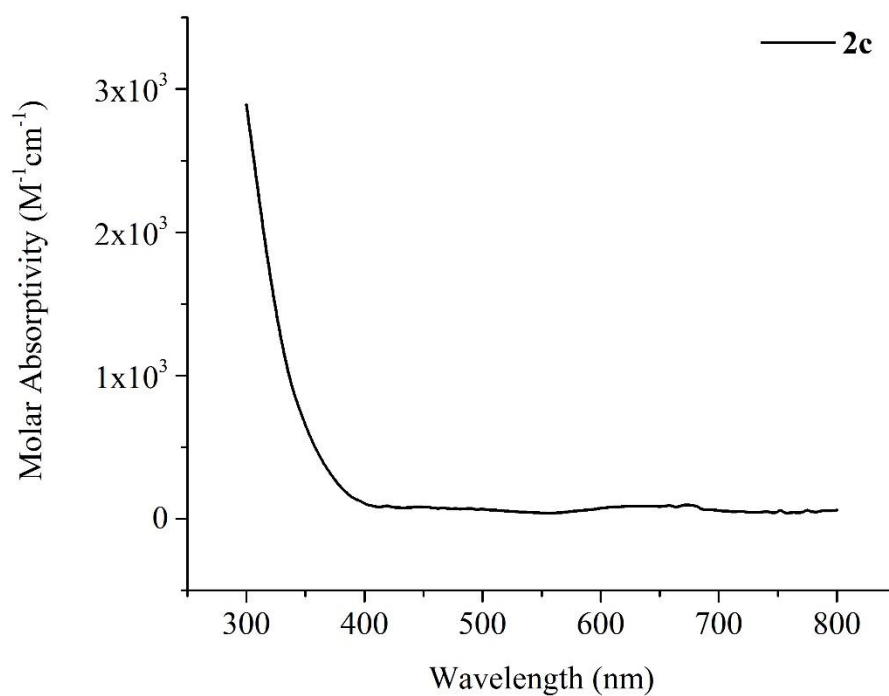

**Figure S4.** Electronic absorption spectrum of  $[\text{Co}(\text{H}_2\text{O})(\text{Py}_5\text{Me}_2)](\text{CF}_3\text{SO}_3)_2$  (**2c**).

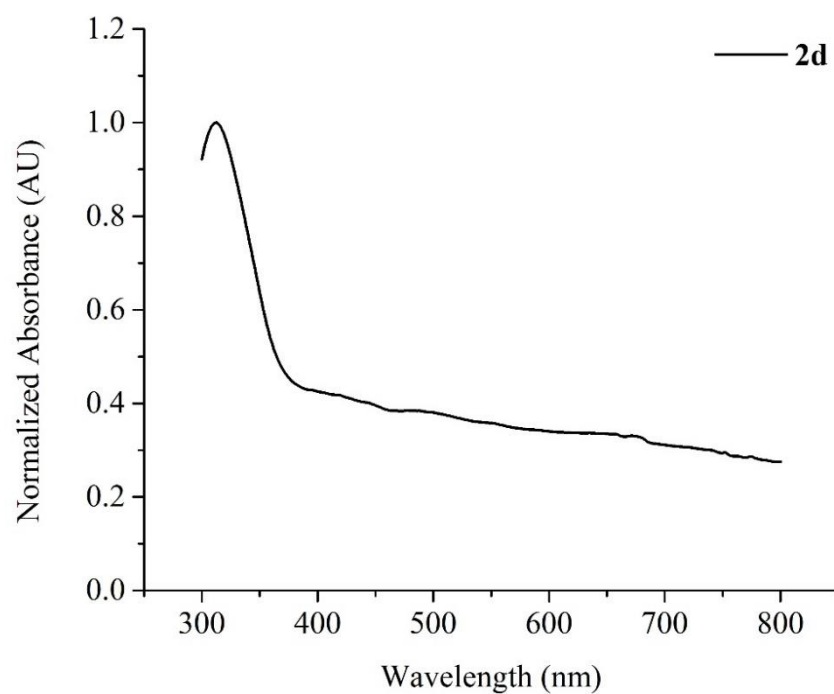

**Figure S5.** Electronic absorption spectrum of  $[\text{Ni}(\text{Py}_5\text{Me}_2)](\text{CF}_3\text{SO}_3)_2$  (**2d**).

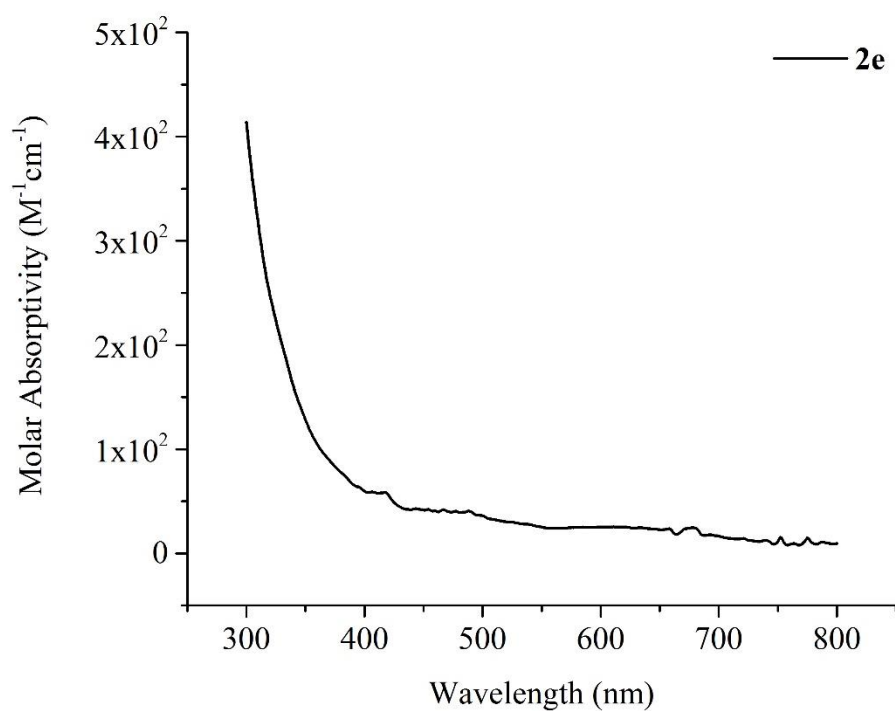

**Figure S6.** Electronic absorption spectrum of  $[\text{Cu}(\text{Py}_5\text{Me}_2)](\text{CF}_3\text{SO}_3)_2$  (**2e**).

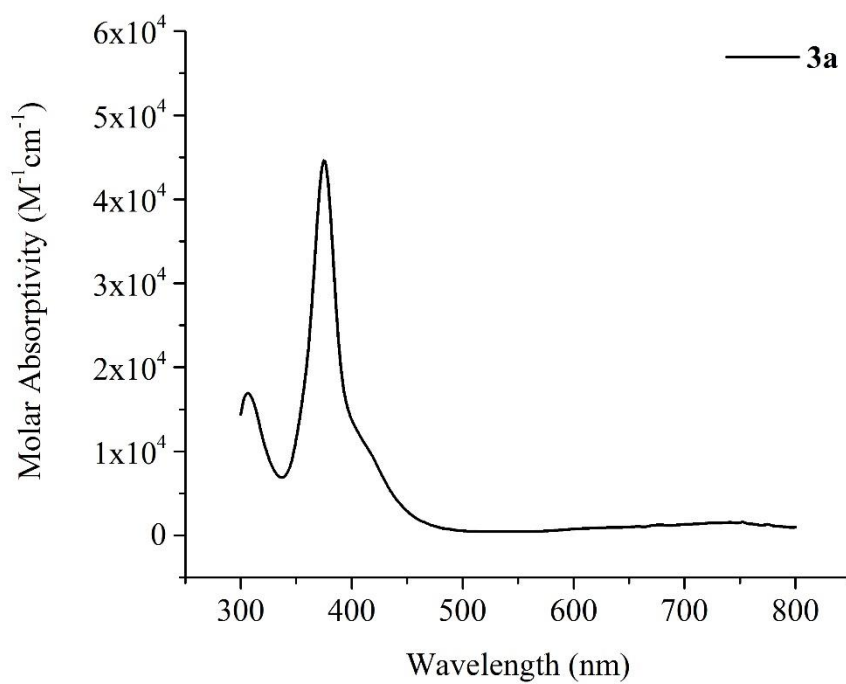

**Figure S7.** Electronic absorption spectrum of  $[(\text{TMTAA})\text{V}=\text{O}\rightarrow\text{Mn}(\text{Py}_5\text{Me}_2)](\text{CF}_3\text{SO}_3)_2$  (**3a**).

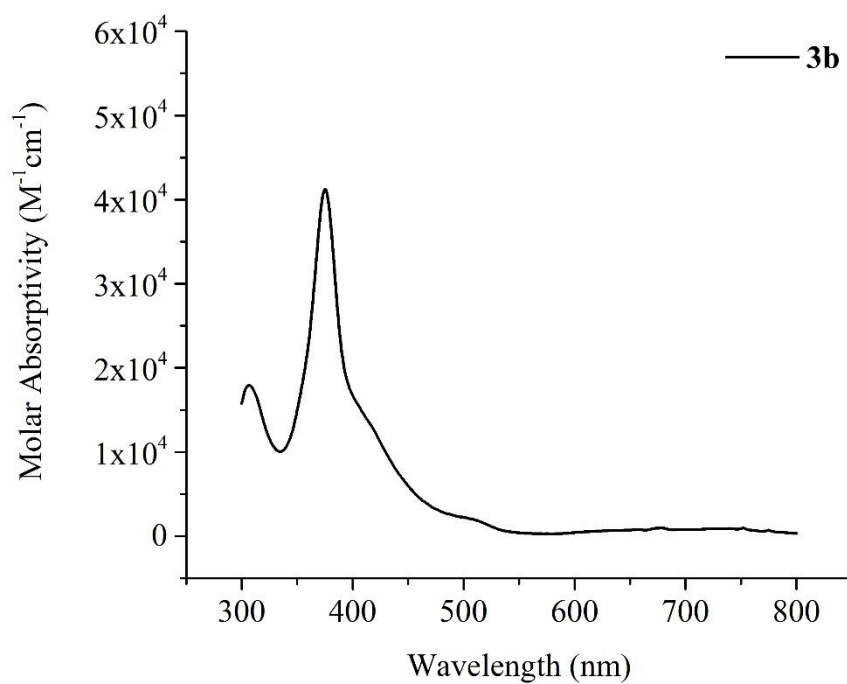

**Figure S8.** Electronic absorption spectrum of  $[(TMTAA)V=O \rightarrow Fe(Py_5Me_2)](CF_3SO_3)_2$  (**3b**).

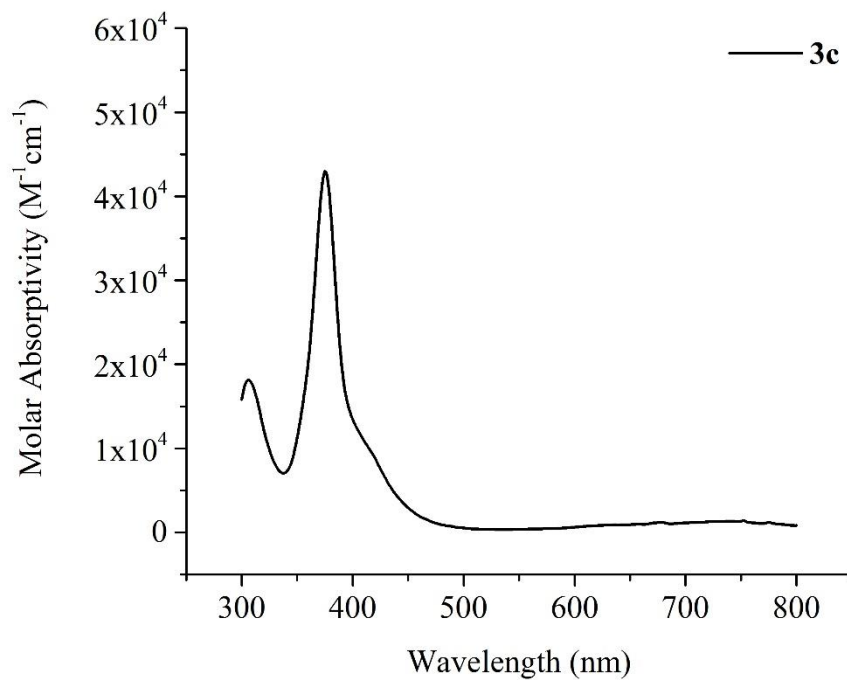

**Figure S9.** Electronic absorption spectrum of  $[(TMTAA)V=O \rightarrow Co(Py_5Me_2)](CF_3SO_3)_2$  (**3c**).

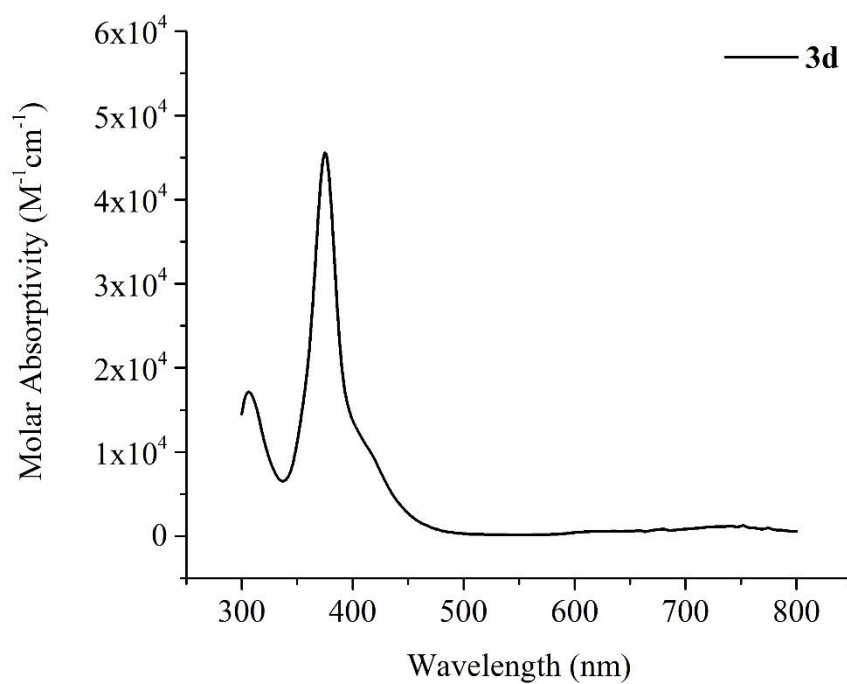

**Figure S10.** Electronic absorption spectrum of  $[(TMTAA)V=O \rightarrow Ni(Py_5Me_2)](CF_3SO_3)_2$  (**3d**).

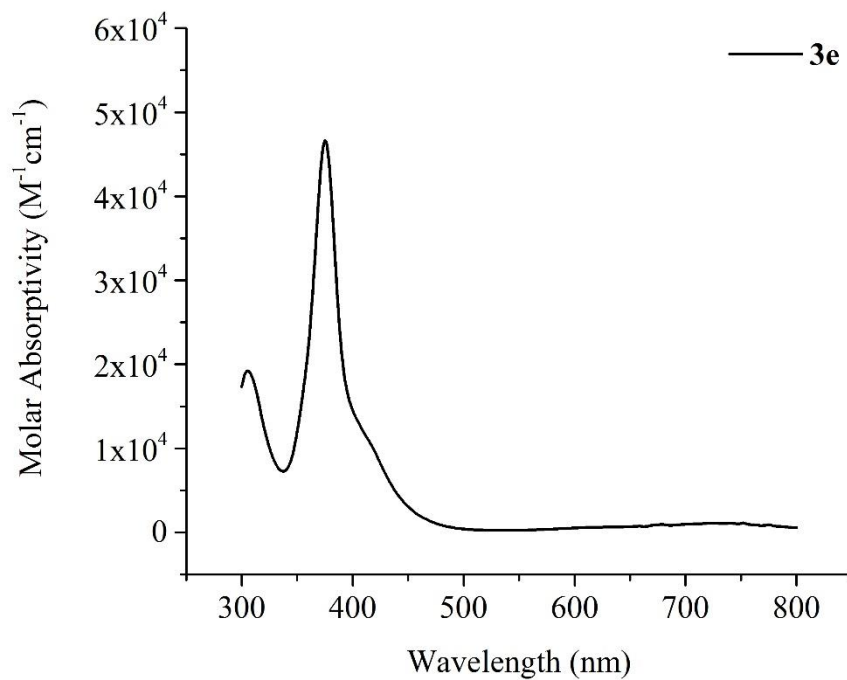

**Figure S11.** Electronic absorption spectrum of  $[(TMTAA)V=O \rightarrow Cu(Py_5Me_2)](CF_3SO_3)_2$  (**3e**).



### Solid State ATR-FTIR Spectra

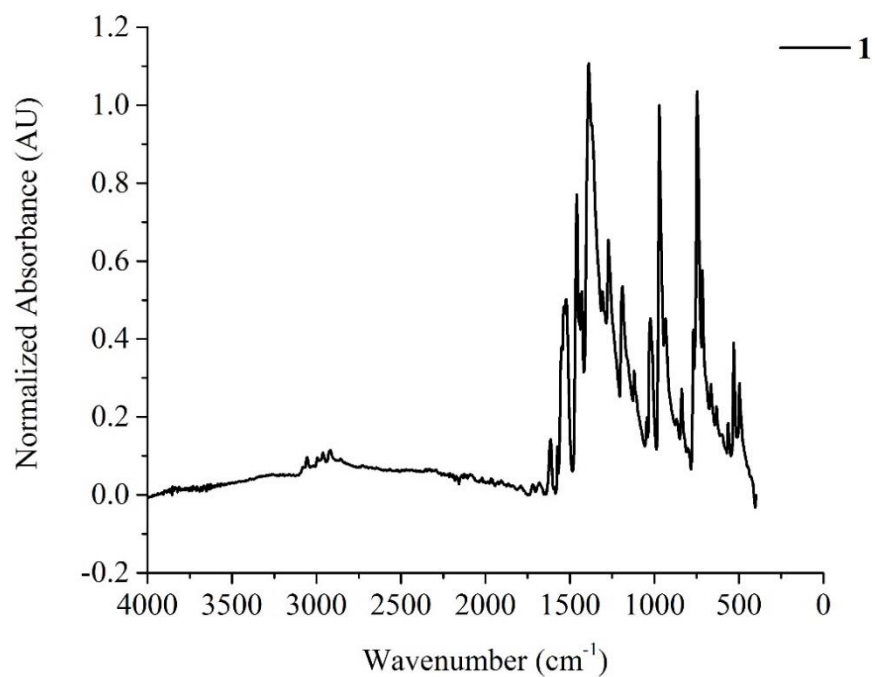

**Figure S12.** Solid State ATR-FTIR spectrum of (TMTAA)V=O (**1**).

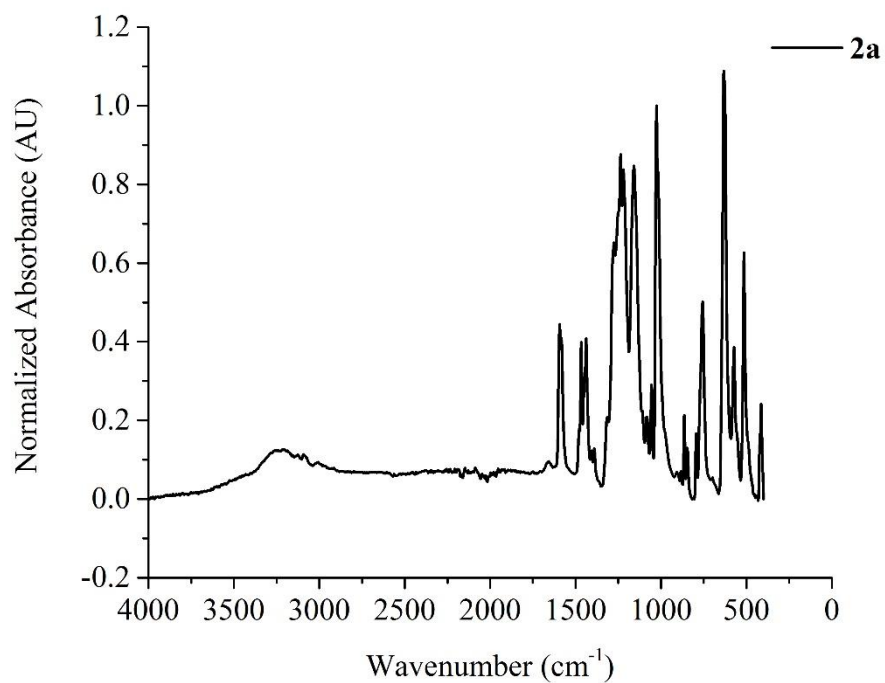

**Figure S13.** Solid State ATR-FTIR spectrum of [Mn(Py<sub>5</sub>Me<sub>2</sub>)](CF<sub>3</sub>SO<sub>3</sub>)<sub>2</sub> (**2a**).

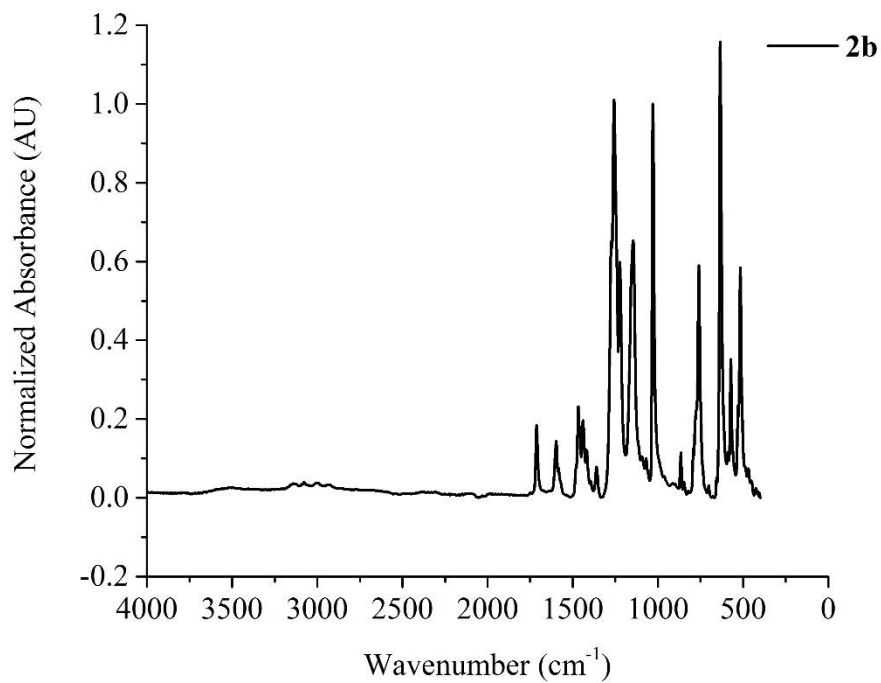

**Figure S14.** Solid State ATR-FTIR spectrum of  $[\text{Fe}(\text{Py}_5\text{Me}_2)](\text{CF}_3\text{SO}_3)_2$  (**2b**).

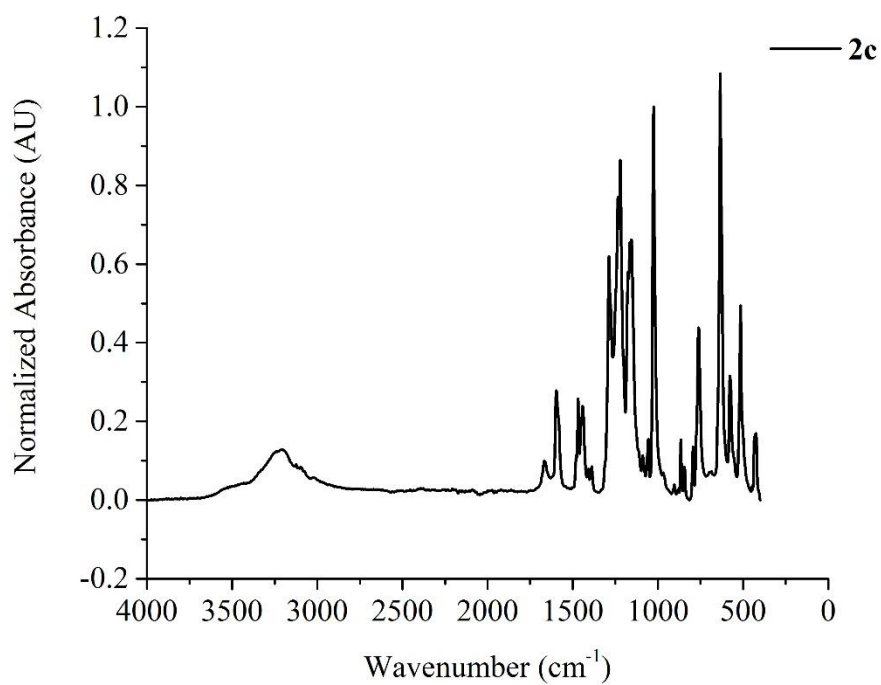

**Figure S15.** Solid State ATR-FTIR spectrum of  $[\text{Co}(\text{H}_2\text{O})(\text{Py}_5\text{Me}_2)](\text{CF}_3\text{SO}_3)_2$  (**2c**).

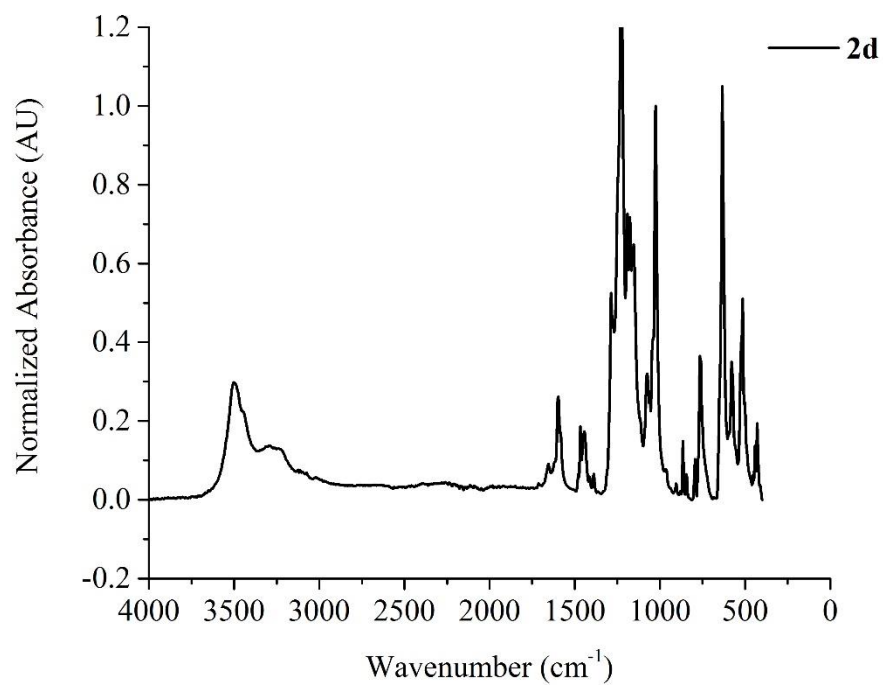

**Figure S16.** Solid State ATR-FTIR spectrum of [Ni(Py<sub>5</sub>Me<sub>2</sub>)](CF<sub>3</sub>SO<sub>3</sub>)<sub>2</sub> (**2d**).

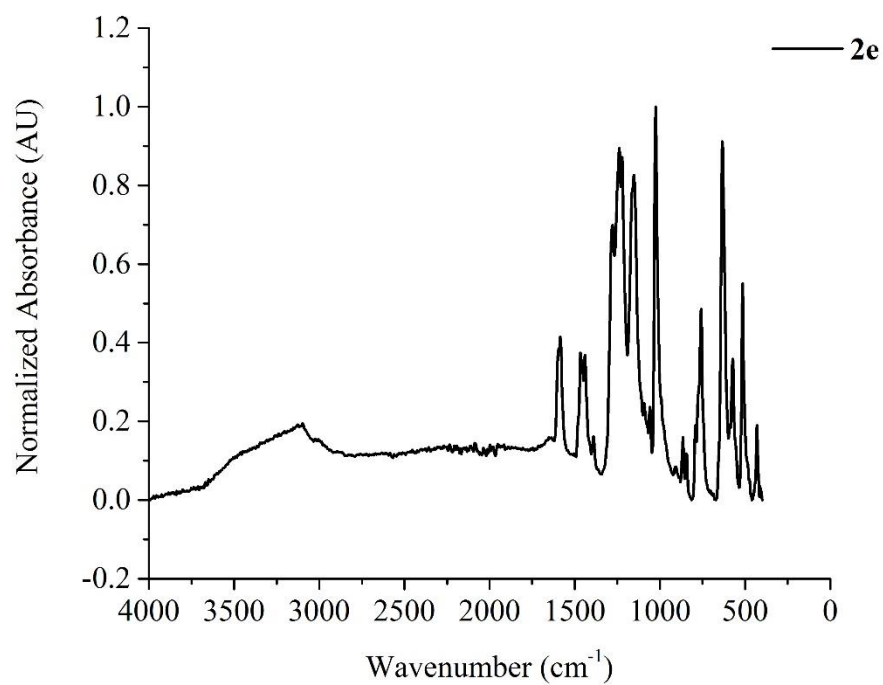

**Figure S17.** Solid State ATR-FTIR spectrum of [Cu(Py<sub>5</sub>Me<sub>2</sub>)](CF<sub>3</sub>SO<sub>3</sub>)<sub>2</sub> (**2e**).

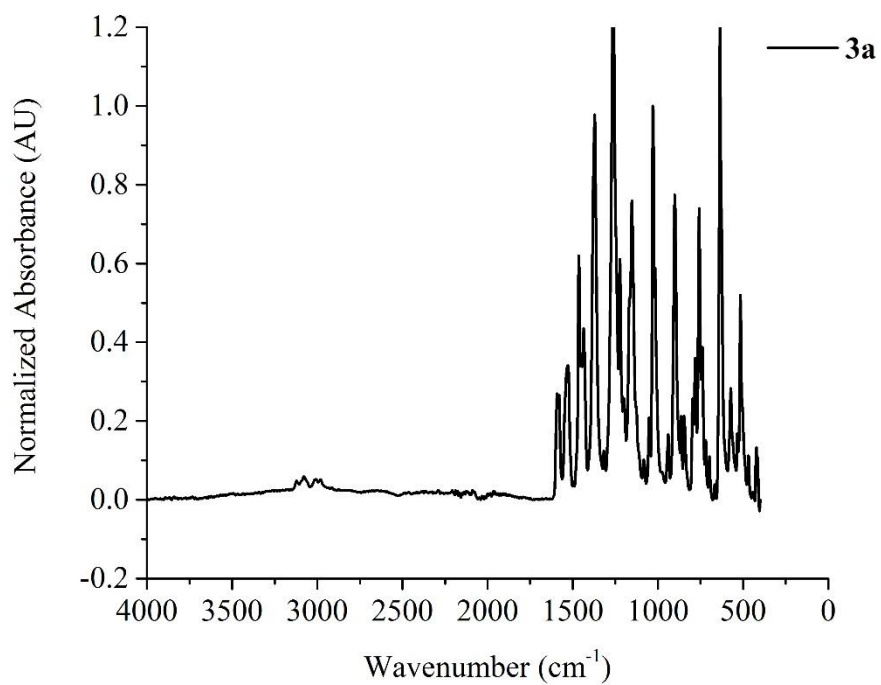

**Figure S18.** Solid State ATR-FTIR spectrum of  $[(\text{TMTAA})\text{V}=\text{O} \rightarrow \text{Mn}(\text{Py}_5\text{Me}_2)](\text{CF}_3\text{SO}_3)_2$  (**3a**).

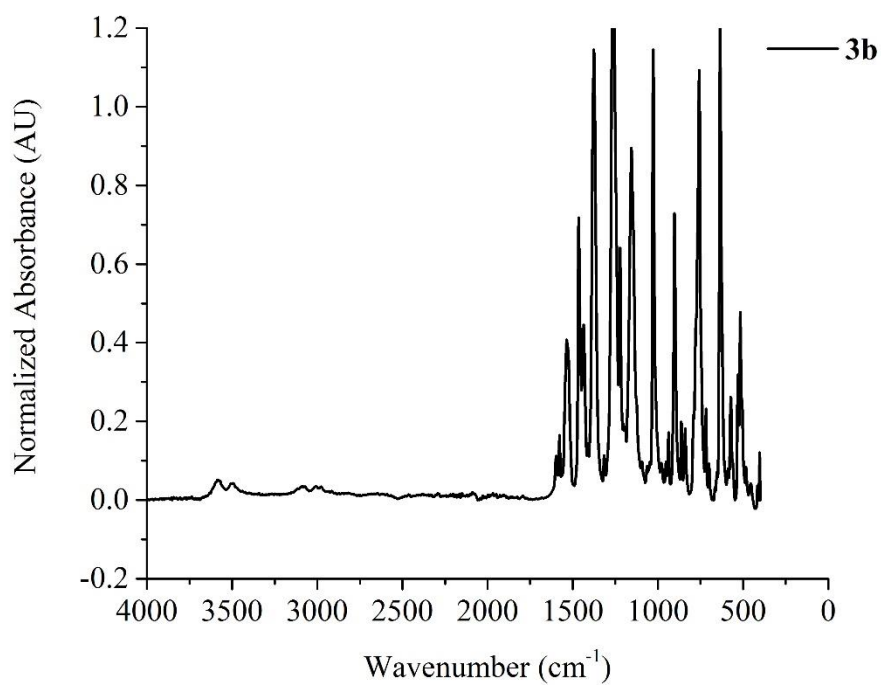

**Figure S19.** Solid State ATR-FTIR spectrum of  $[(\text{TMTAA})\text{V}=\text{O} \rightarrow \text{Fe}(\text{Py}_5\text{Me}_2)](\text{CF}_3\text{SO}_3)_2$  (**3b**).

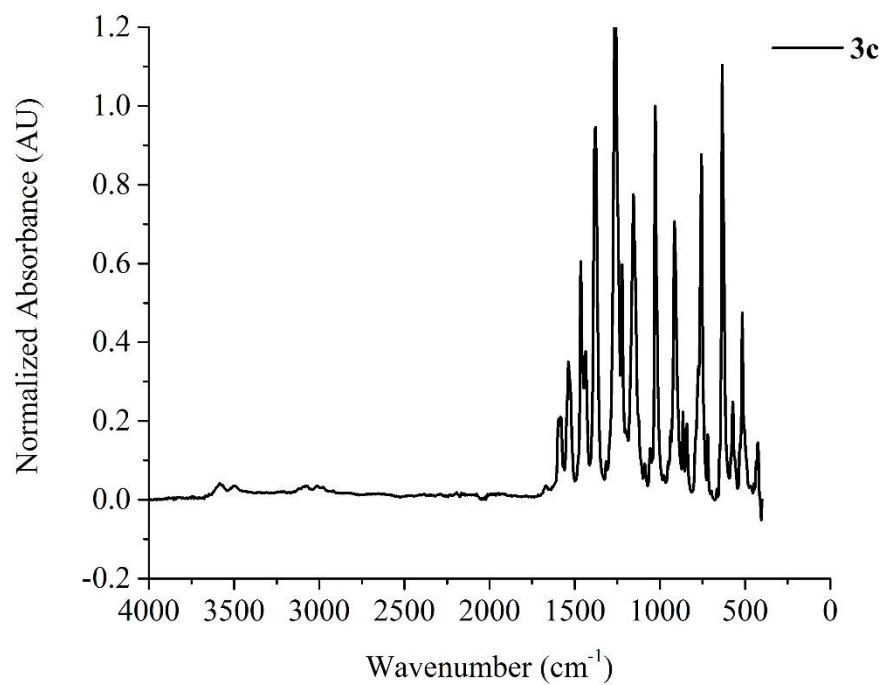

**Figure S20.** Solid State ATR-FTIR spectrum of  $[(\text{TMTAA})\text{V}=\text{O} \rightarrow \text{Co}(\text{Py}_5\text{Me}_2)](\text{CF}_3\text{SO}_3)_2$  (**3c**).

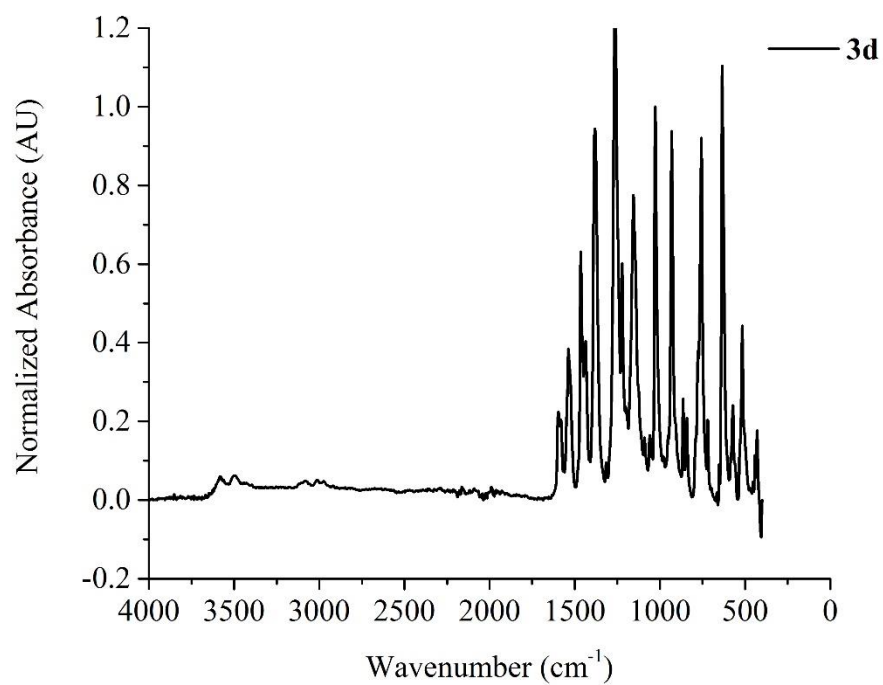

**Figure S21.** Solid State ATR-FTIR spectrum of  $[(\text{TMTAA})\text{V}=\text{O} \rightarrow \text{Ni}(\text{Py}_5\text{Me}_2)](\text{CF}_3\text{SO}_3)_2$  (**3d**).

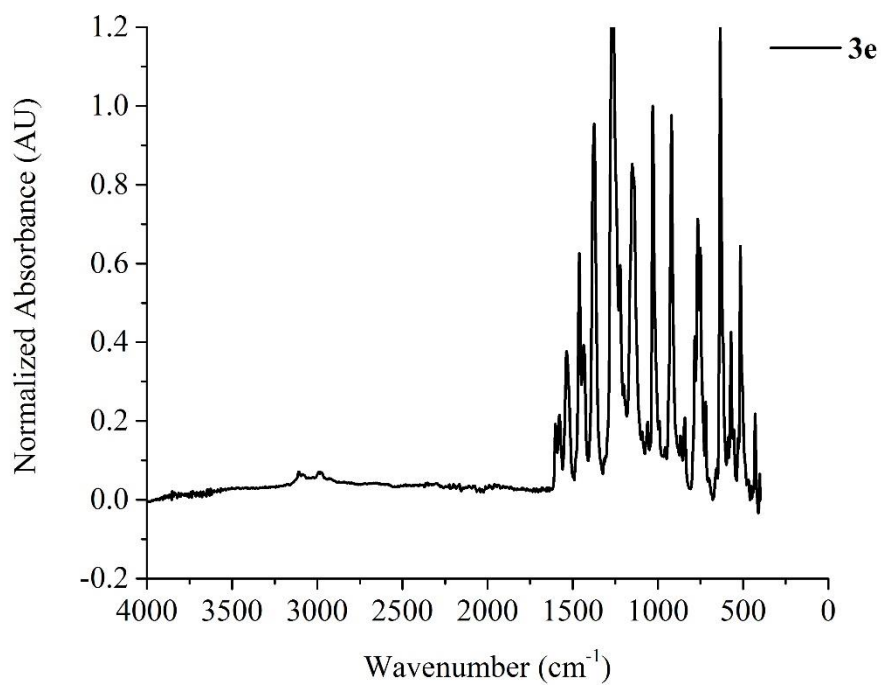

**Figure S22.** Solid State ATR-FTIR spectrum of  $[(\text{TMTAA})\text{V}=\text{O}\rightarrow\text{Cu}(\text{Py}_5\text{Me}_2)](\text{CF}_3\text{SO}_3)_2$  (**3e**).

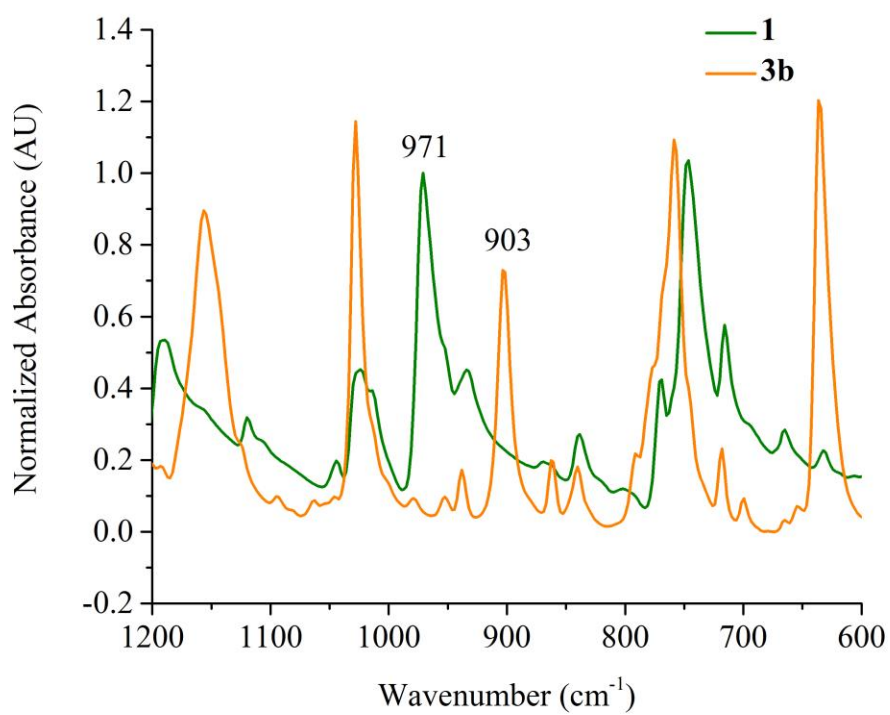

**Figure S23.** Overlay of ATR-FTIR spectra of **1** and **3b**.

## ESI-HRMS Results

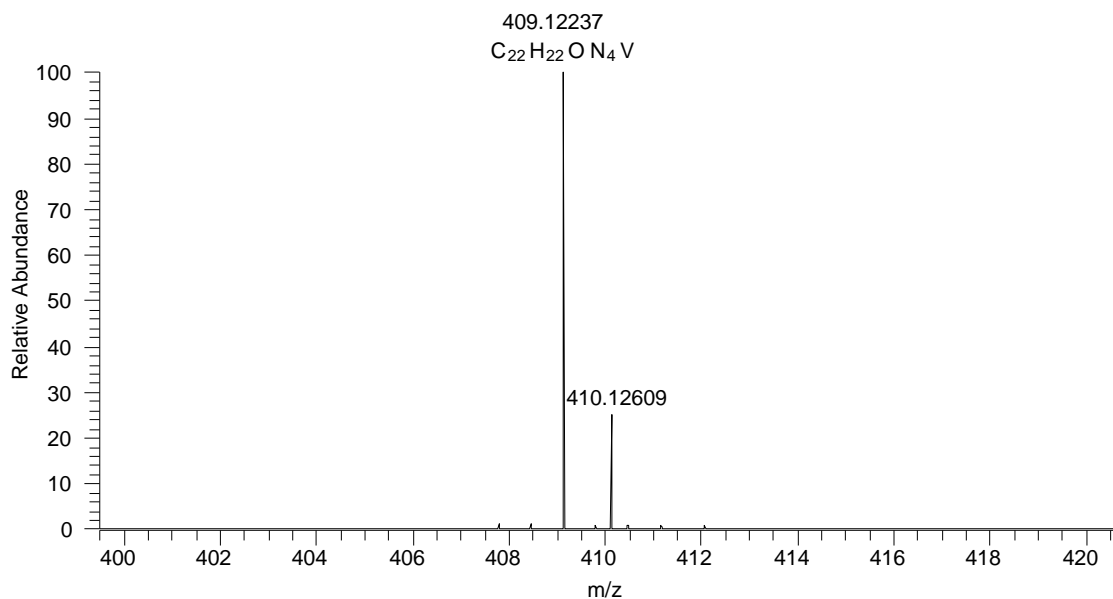

C<sub>22</sub>H<sub>22</sub>O N<sub>4</sub>V: C<sub>22</sub>H<sub>22</sub>O<sub>1</sub>N<sub>4</sub>V<sub>1</sub> pa Chro 1

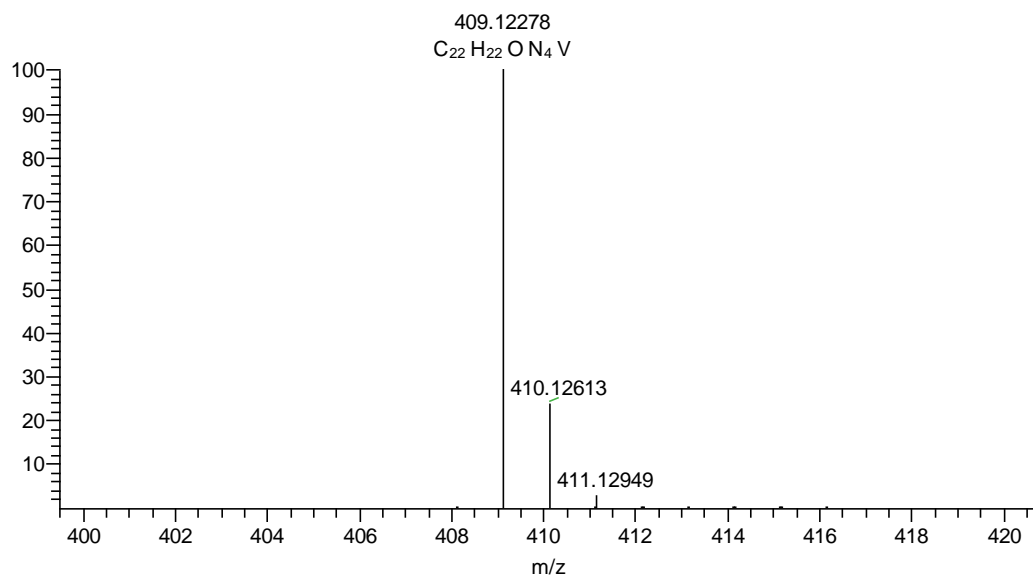

**Figure S24.** ESI-HRMS result of (TMTAA)V=O (**1**). Above: Experimental result. Below: Simulated spectrum.

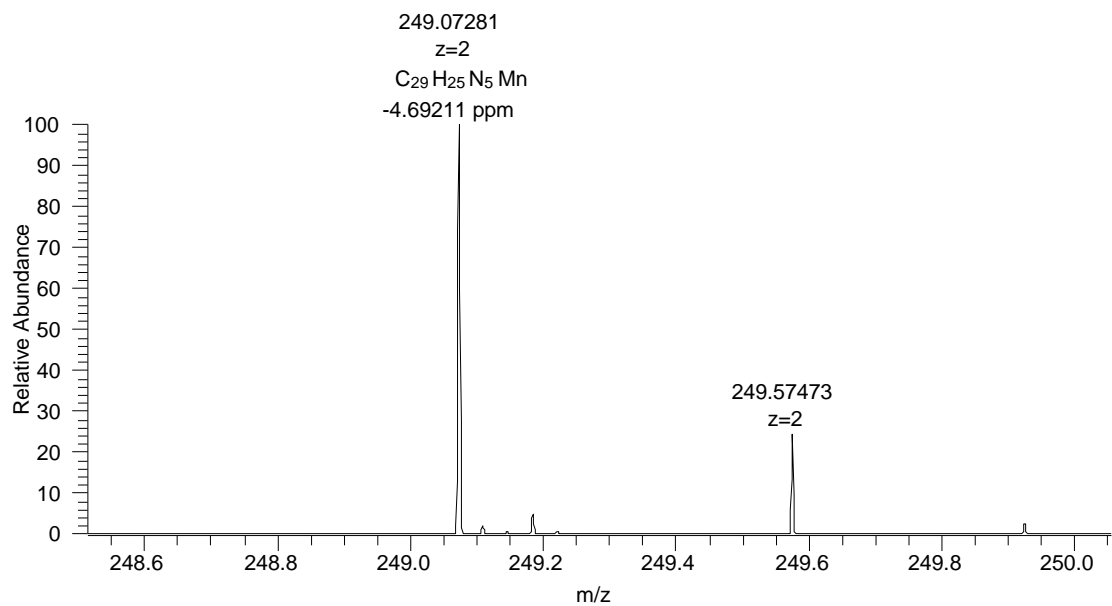

C<sub>29</sub>H<sub>25</sub>N<sub>5</sub>Mn: C<sub>29</sub>H<sub>25</sub>N<sub>5</sub>Mn1 pa Chrg 2

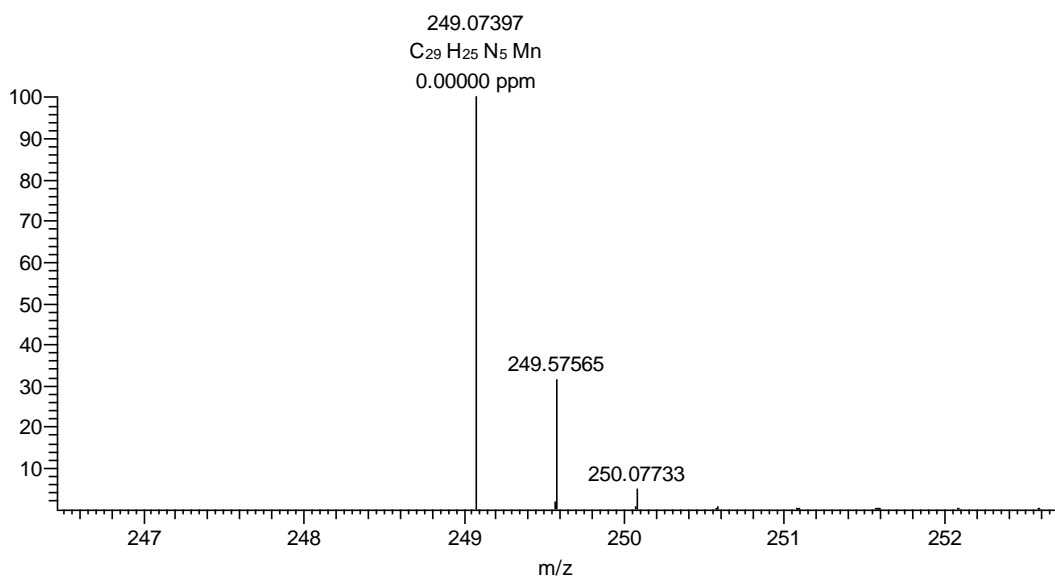

**Figure S25.** ESI-HRMS result of [Mn(Py<sub>5</sub>Me<sub>2</sub>)](CF<sub>3</sub>SO<sub>3</sub>)<sub>2</sub> (**2a**). Above: Experimental result. Below: Simulated spectrum.



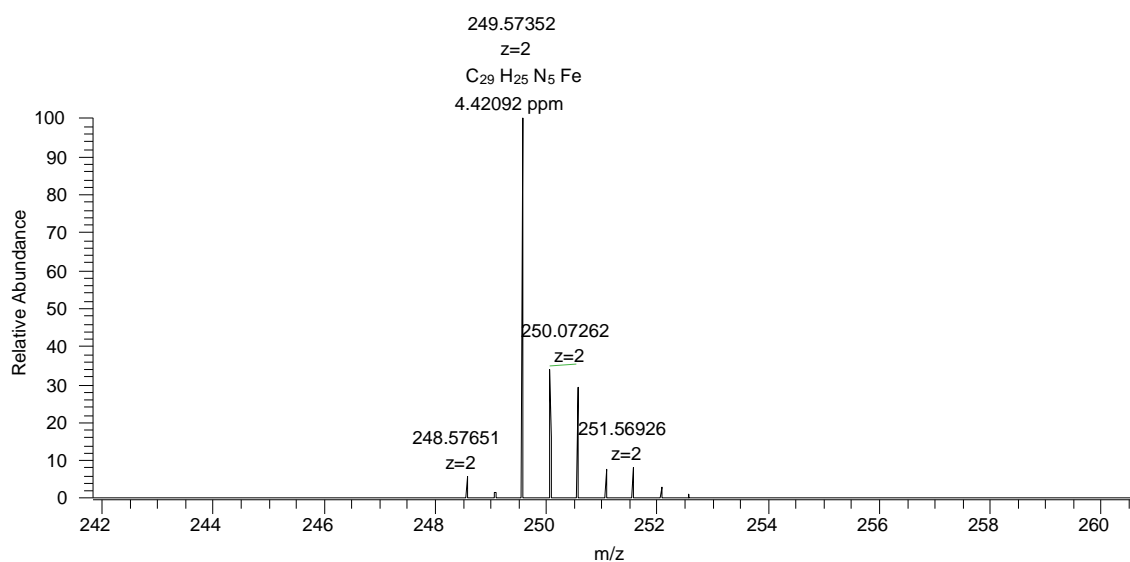

C<sub>29</sub>H<sub>25</sub>N<sub>5</sub>Fe: C<sub>29</sub>H<sub>25</sub>N<sub>5</sub>Fe1 pa Chrg 2

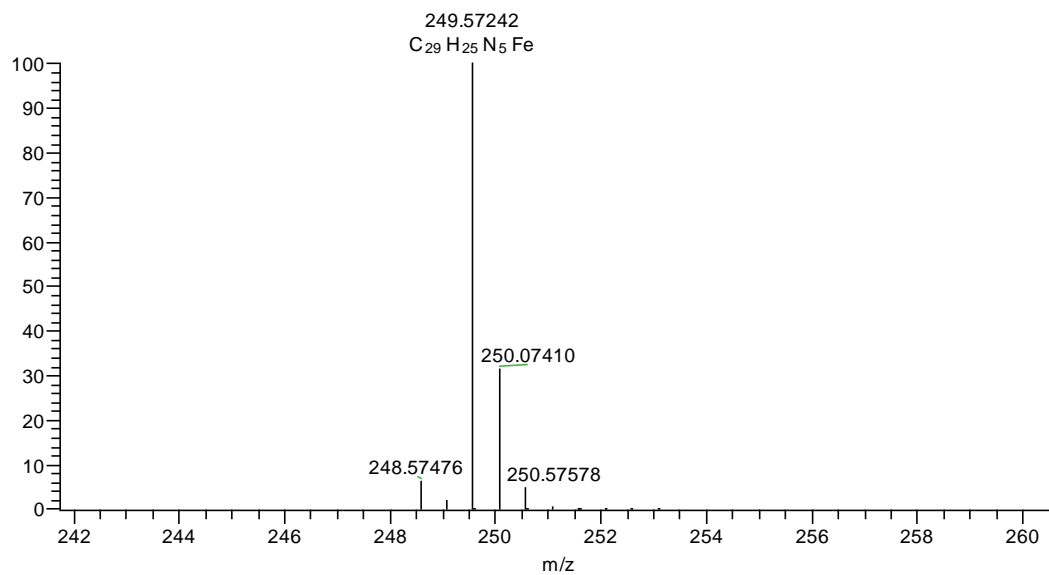

**Figure S26.** ESI-HRMS result of [Fe(Py<sub>5</sub>Me<sub>2</sub>)](CF<sub>3</sub>SO<sub>3</sub>)<sub>2</sub> (**2b**). Above: Experimental result. Below: Simulated spectrum.

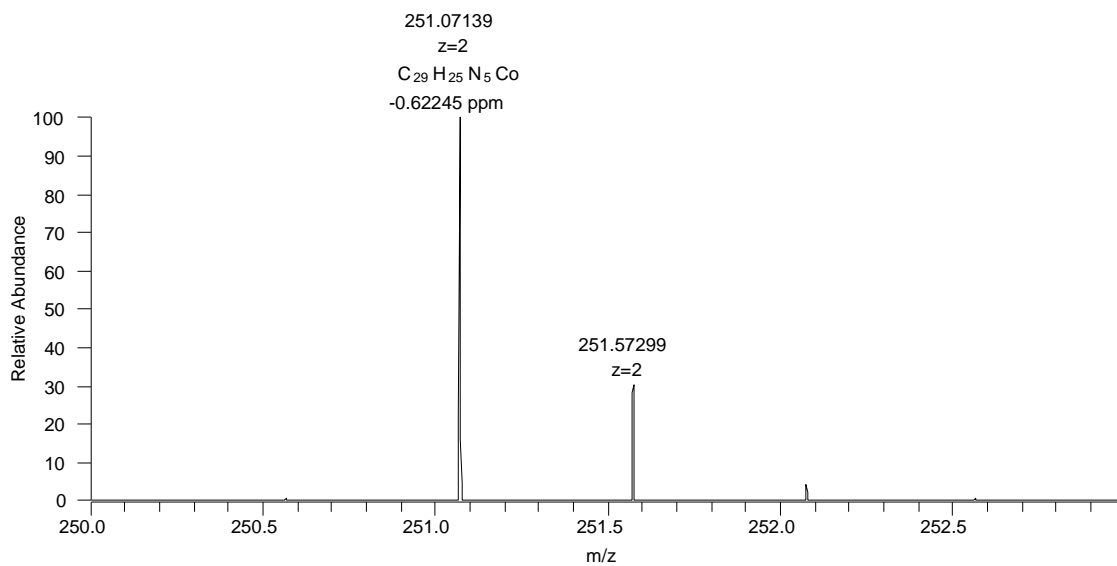

C<sub>29</sub>H<sub>25</sub>N<sub>5</sub>Co: C<sub>29</sub>H<sub>25</sub>N<sub>5</sub>Co1 pa Chrg 2

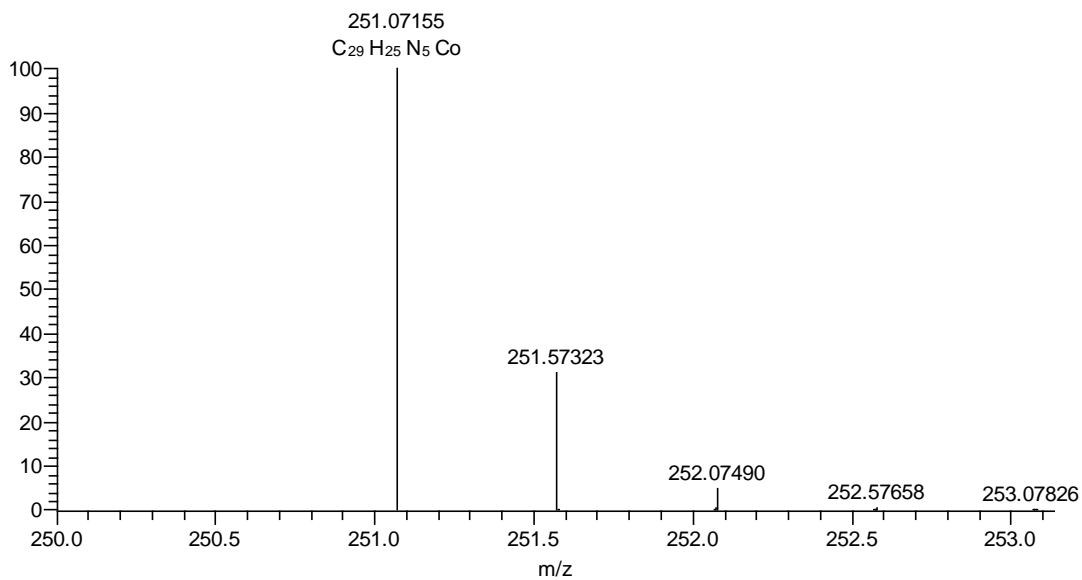

**Figure S27.** ESI-HRMS result of [Co(Py<sub>5</sub>Me<sub>2</sub>)](CF<sub>3</sub>SO<sub>3</sub>)<sub>2</sub> (**2c**). Above: Experimental result. Below: Simulated spectrum.

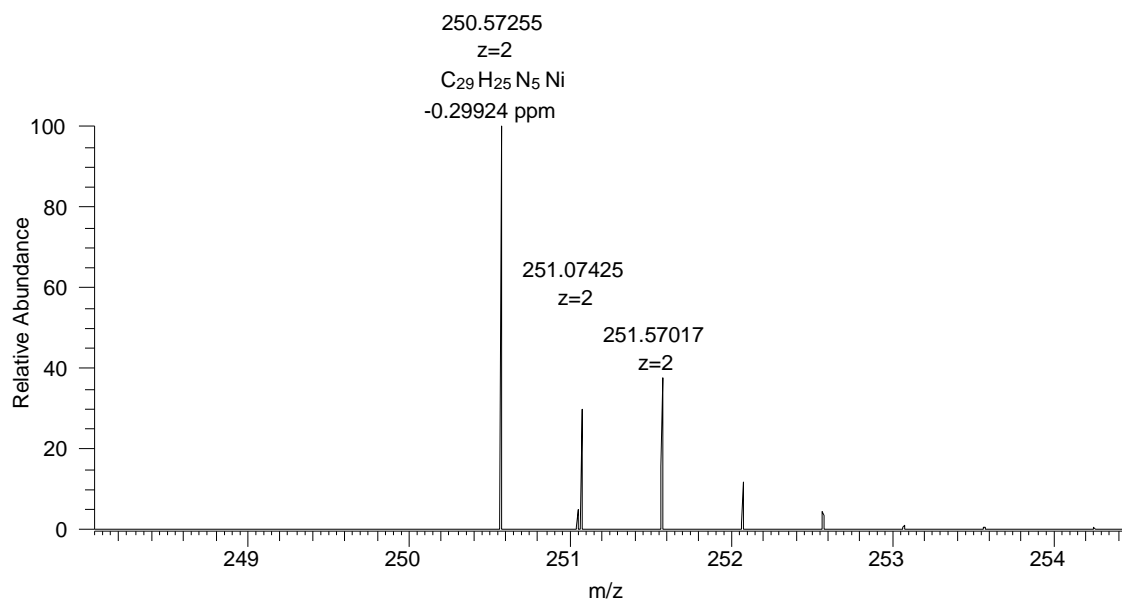

C<sub>29</sub>H<sub>25</sub>N<sub>5</sub>Ni: C<sub>29</sub>H<sub>25</sub>N<sub>5</sub>Ni1 pa Chrg 2

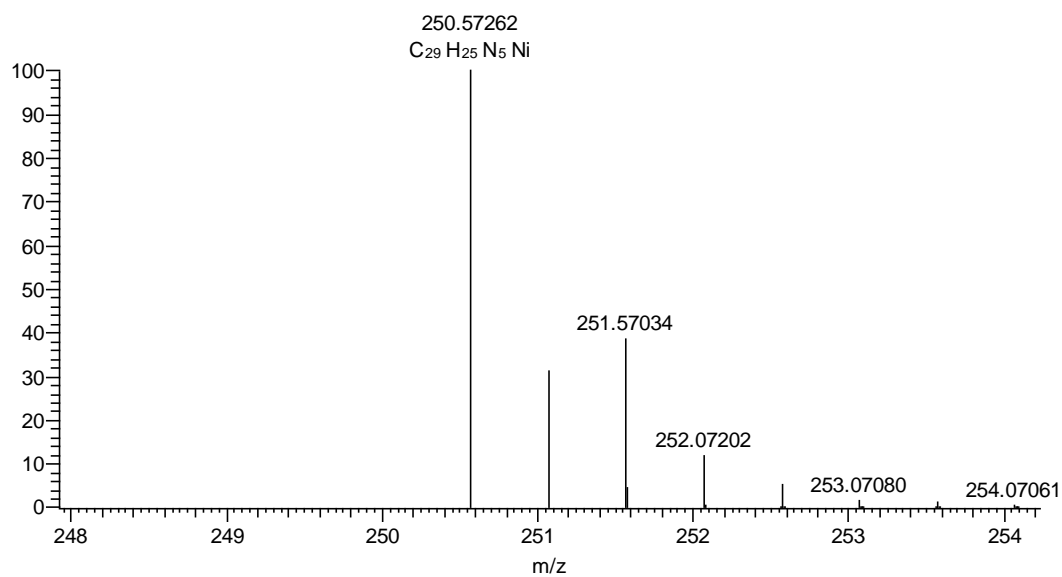

**Figure S28.** ESI-HRMS result of [Ni(Py<sub>5</sub>Me<sub>2</sub>)](CF<sub>3</sub>SO<sub>3</sub>)<sub>2</sub> (**2d**). Above: Experimental result. Below: Simulated spectrum.

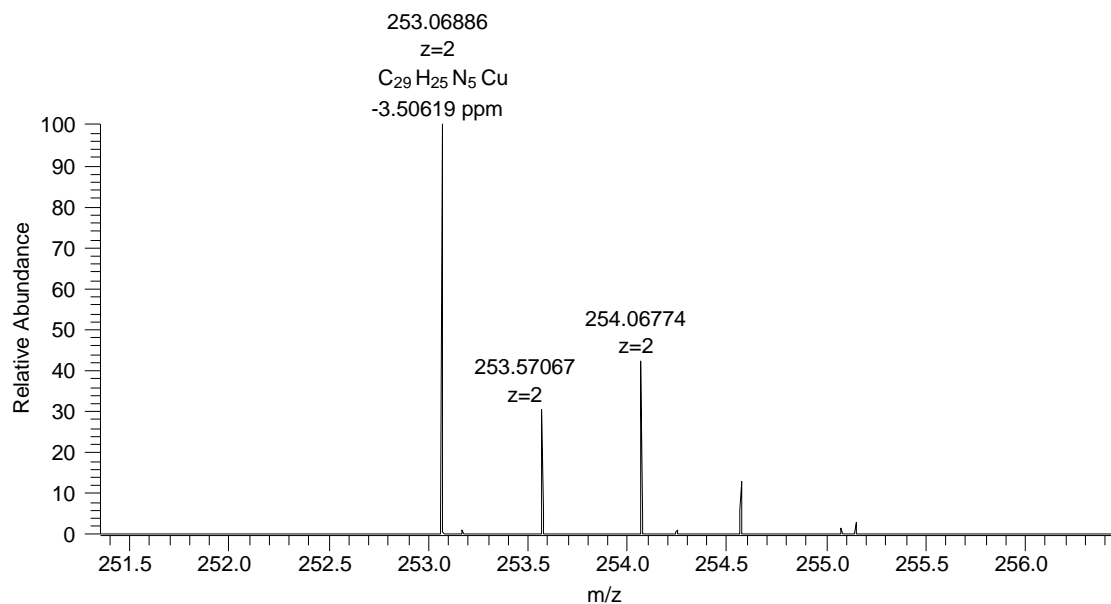

C<sub>29</sub>H<sub>25</sub>N<sub>5</sub>Cu: C<sub>29</sub>H<sub>25</sub>N<sub>5</sub>Cu1 pa Chrg 2

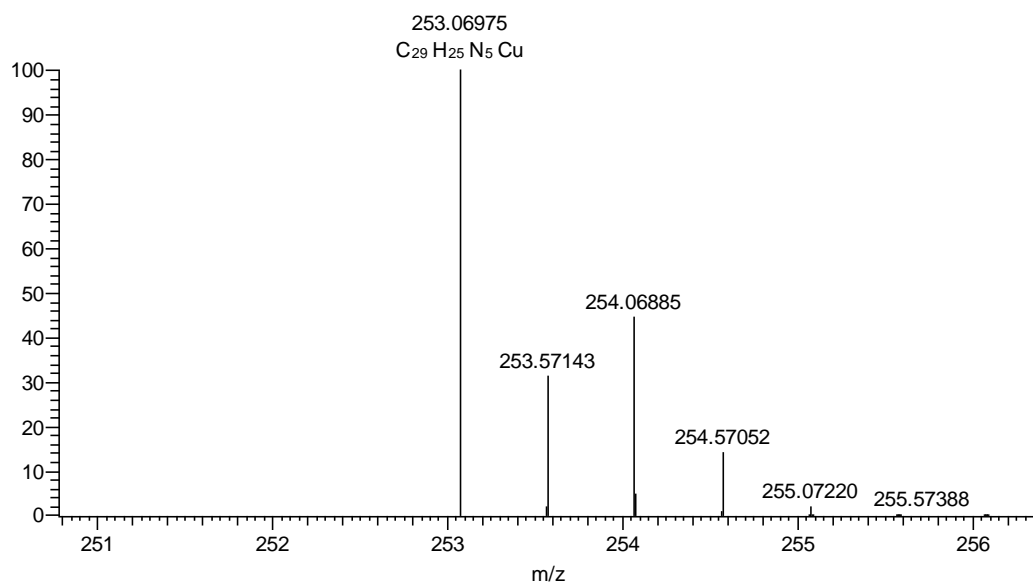

**Figure S29.** ESI-HRMS result of [Cu(Py<sub>5</sub>Me<sub>2</sub>)](CF<sub>3</sub>SO<sub>3</sub>)<sub>2</sub> (**2e**). Above: Experimental result. Below: Simulated spectrum.

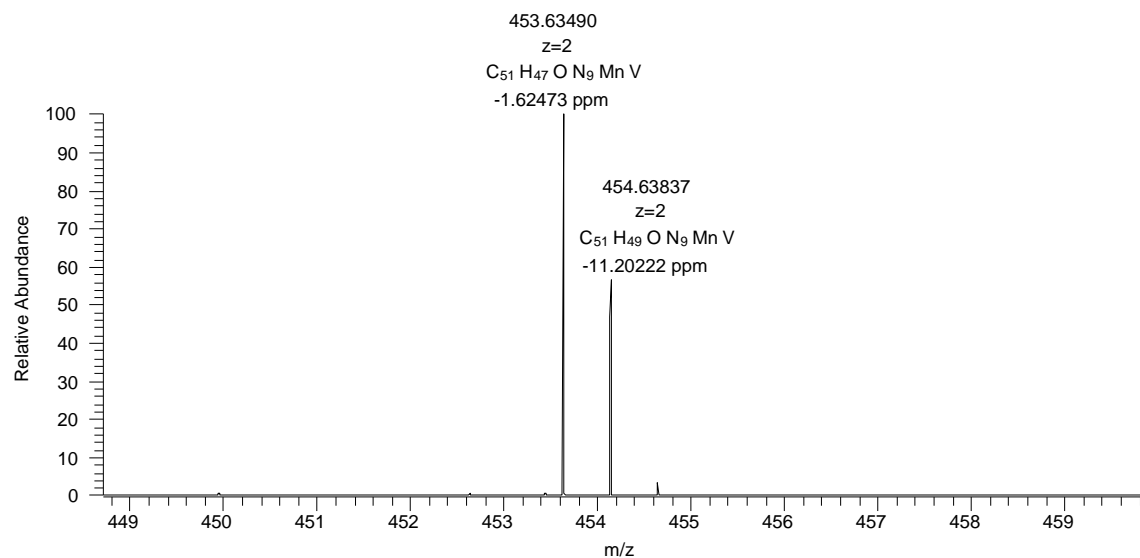

C<sub>51</sub>H<sub>47</sub>O N<sub>9</sub> Mn V: C<sub>51</sub>H<sub>47</sub>O<sub>1</sub>N<sub>9</sub>Mn<sub>1</sub>V<sub>1</sub> da Chro 2

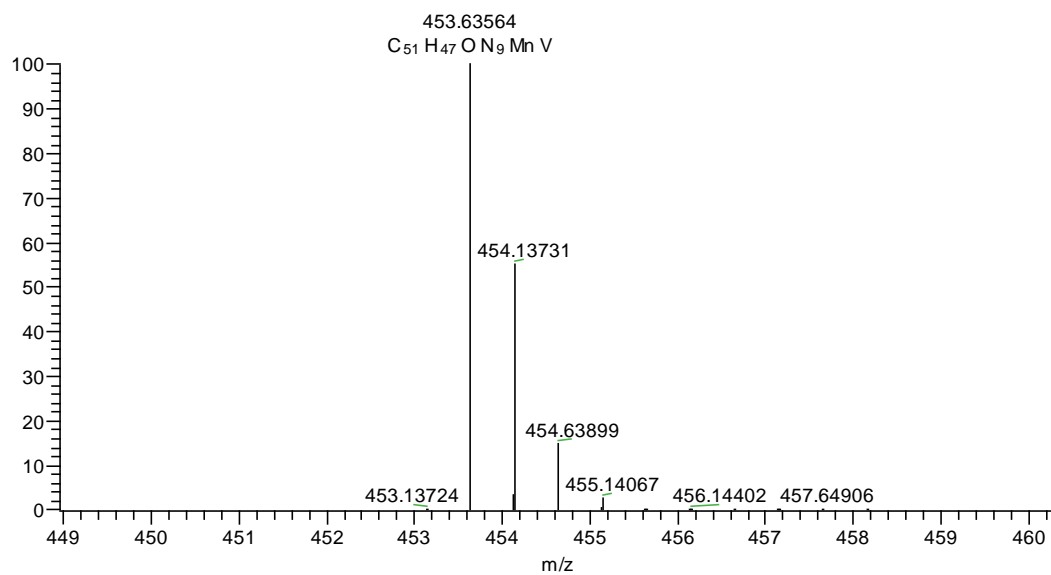

**Figure S30.** ESI-HRMS result of [(TMTAA)V=O→Mn(Py<sub>5</sub>Me<sub>2</sub>)](CF<sub>3</sub>SO<sub>3</sub>)<sub>2</sub> (**3a**). Above: Experimental result. Below: Simulated spectrum.

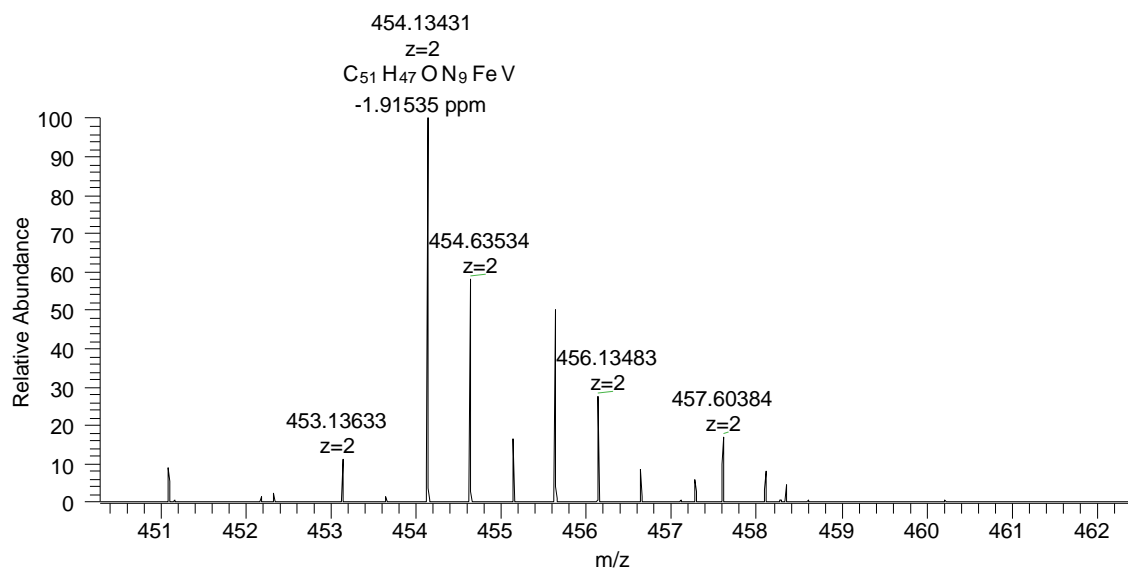

C<sub>51</sub>H<sub>47</sub>O<sub>9</sub>FeV: C<sub>51</sub>H<sub>47</sub>O<sub>1</sub>N<sub>9</sub>Fe<sub>1</sub>V<sub>1</sub> na Chrm 2

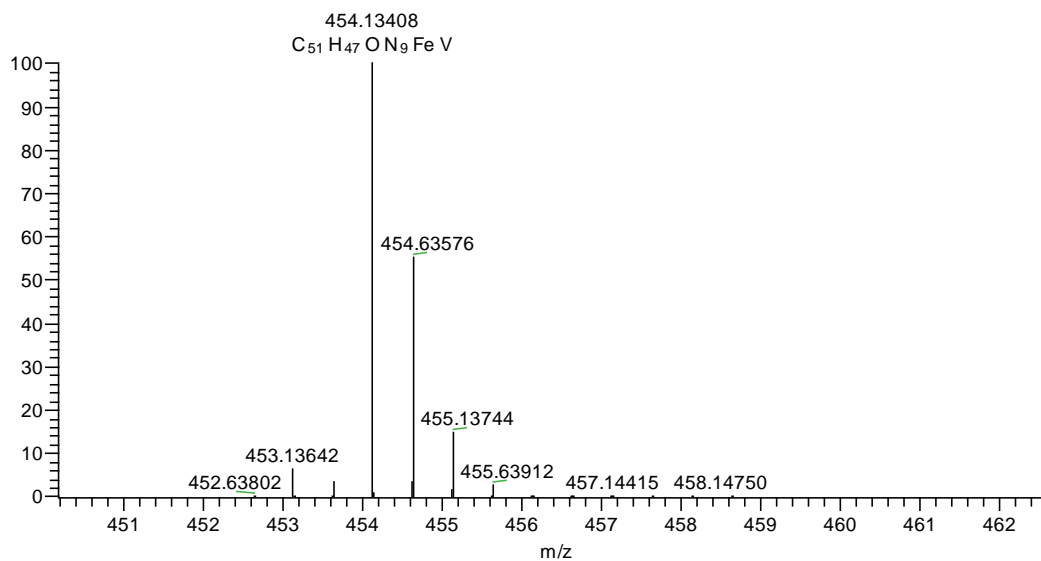

**Figure S31.** ESI-HRMS result of [(TMTAA)V=O→Fe(Py<sub>5</sub>Me<sub>2</sub>)](CF<sub>3</sub>SO<sub>3</sub>)<sub>2</sub> (**3b**). Above: Experimental result. Below: Simulated spectrum.

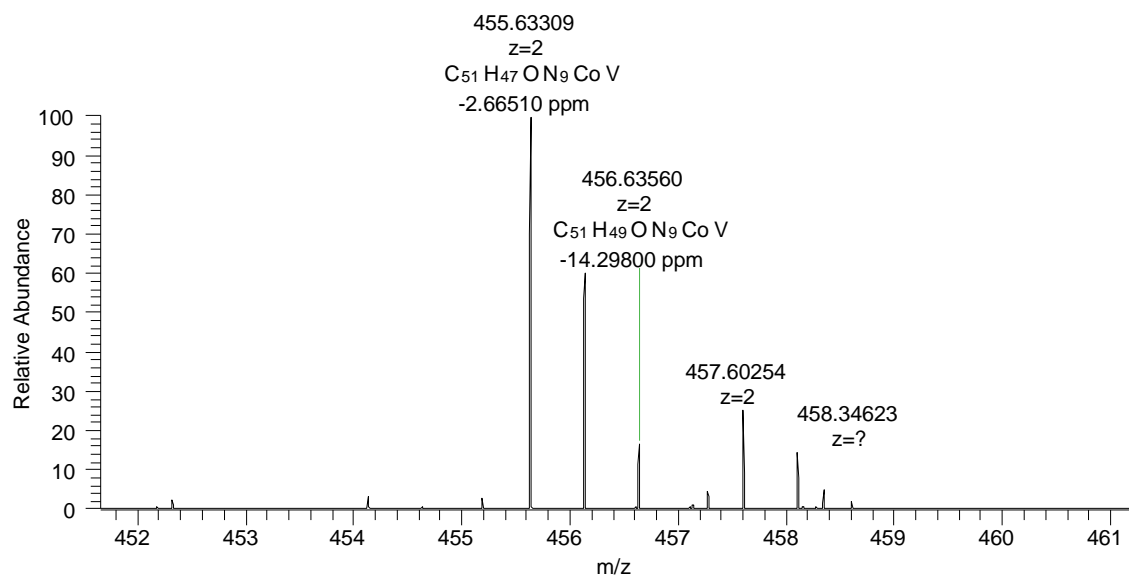

$C_{51}H_{47}ON_9CoV$ :  $C_{51}H_{47}O_1N_9Co_1V_1$  da Chro 2

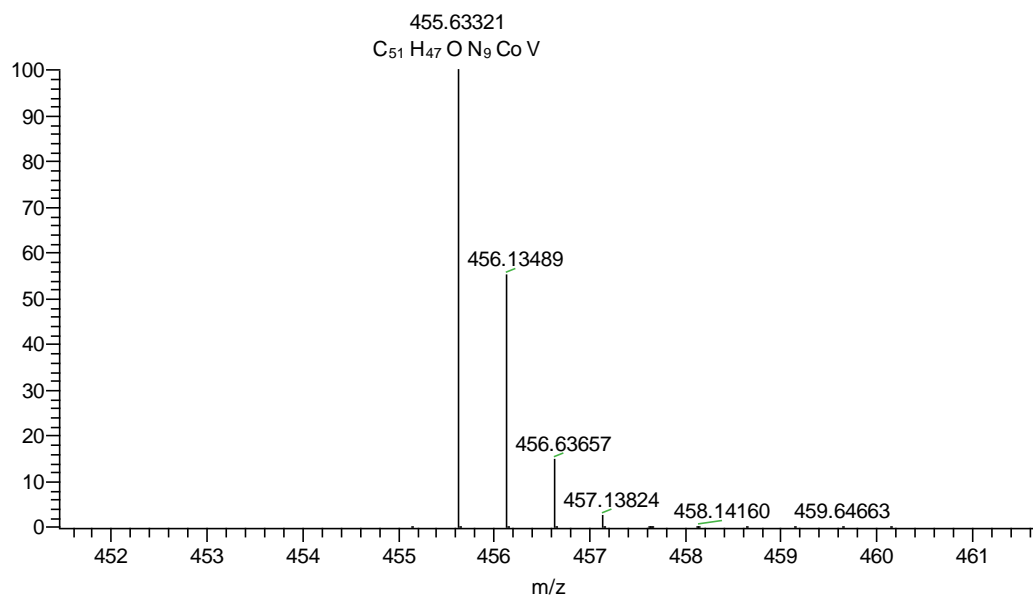

**Figure S32.** ESI-HRMS result of  $[(TMTAA)V=O \rightarrow Co(Py_5Me_2)](CF_3SO_3)_2$  (**3c**). Above: Experimental result. Below: Simulated spectrum.

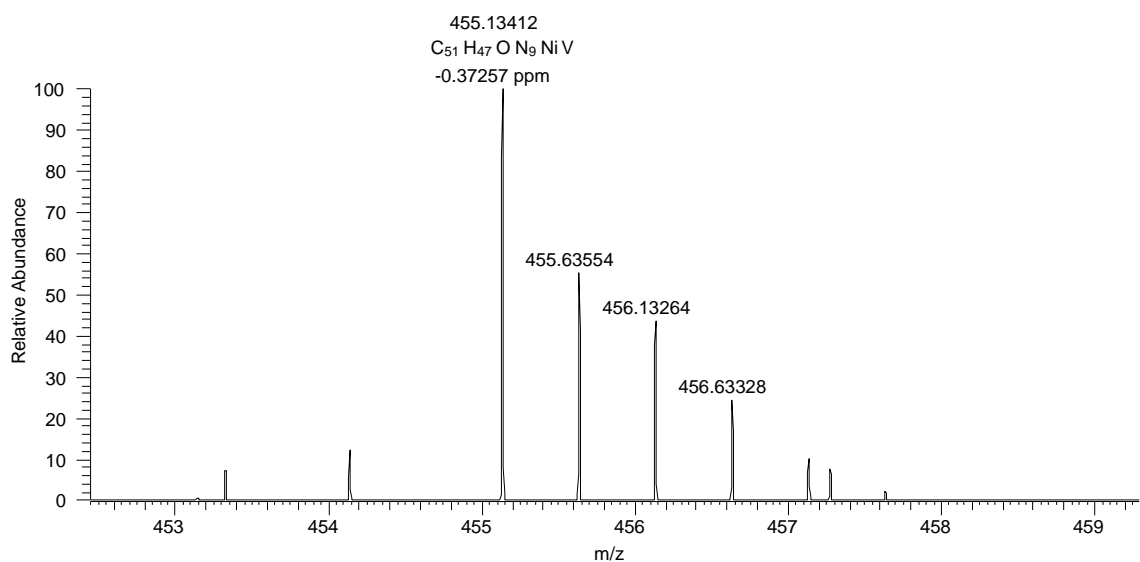

C<sub>51</sub> H<sub>47</sub> O N<sub>9</sub> Ni V: C<sub>51</sub> H<sub>47</sub> O<sub>1</sub> N<sub>9</sub> Ni<sub>1</sub> V<sub>1</sub> da Chro 2

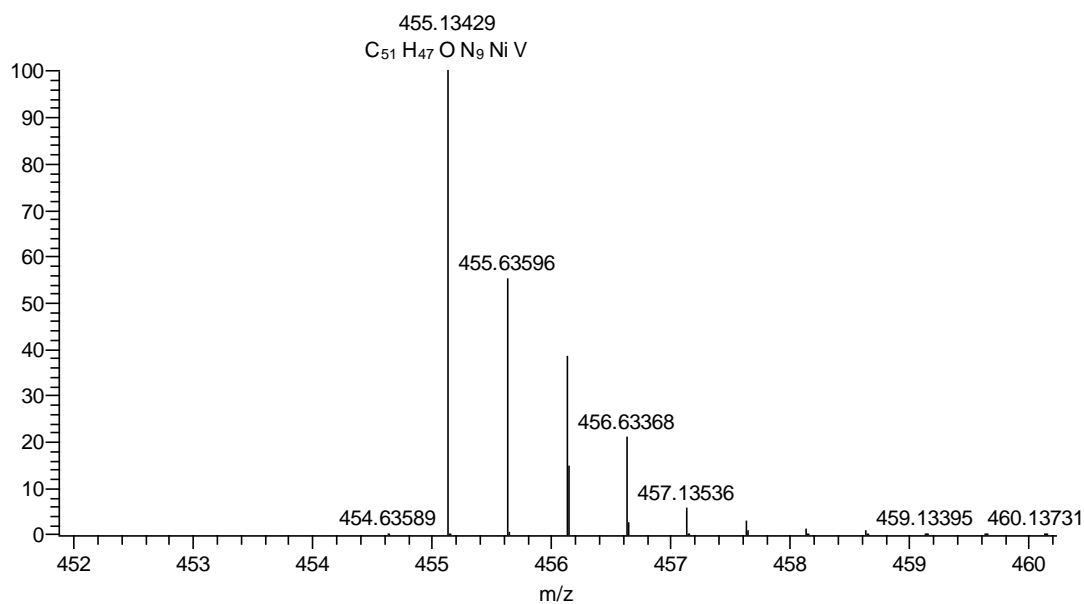

**Figure S33.** ESI-HRMS result of [(TMTAA)V=O→Ni(Py<sub>5</sub>Me<sub>2</sub>)](CF<sub>3</sub>SO<sub>3</sub>)<sub>2</sub> (**3d**). Above: Experimental result. Below: Simulated spectrum.



## Crystallographic Details

**Table S1.** Crystal data and structure refinement of **3a**.

|                                                              |                                                                                                 |
|--------------------------------------------------------------|-------------------------------------------------------------------------------------------------|
| Empirical formula                                            | C <sub>56</sub> H <sub>53</sub> F <sub>6</sub> MnN <sub>9</sub> O <sub>8</sub> S <sub>2</sub> V |
| Formula weight                                               | 1264.07                                                                                         |
| Temperature (K)                                              | 110(2)                                                                                          |
| Wavelength (Å)                                               | 0.71073                                                                                         |
| Crystal System                                               | triclinic                                                                                       |
| Space Group                                                  | <i>P</i> $\bar{1}$                                                                              |
| a (Å)                                                        | 13.2168(3)                                                                                      |
| b (Å)                                                        | 13.4371(3)                                                                                      |
| c (Å)                                                        | 18.6579(4)                                                                                      |
| $\alpha$ (°)                                                 | 102.5680(10)                                                                                    |
| $\beta$ (°)                                                  | 96.7380(10)                                                                                     |
| $\gamma$ (°)                                                 | 118.6840(10)                                                                                    |
| Volume (Å <sup>3</sup> )                                     | 2740.45(11)                                                                                     |
| Z                                                            | 2                                                                                               |
| $\rho_{\text{calcd}}$ (g/cm <sup>3</sup> )                   | 1.532                                                                                           |
| Absorption coefficient (mm <sup>-1</sup> )                   | 0.562                                                                                           |
| F(000)                                                       | 1300                                                                                            |
| Crystal Size (mm <sup>3</sup> )                              | 0.220 × 0.310 × 0.330                                                                           |
| $\theta$ range for data collection (°)                       | 1.82 to 31.59                                                                                   |
| Reflections collected                                        | 101147                                                                                          |
| Independent reflections                                      | 18356 [ <i>R</i> <sub>int</sub> = 0.0281]                                                       |
| Data/restraints/parameters                                   | 18356 / 57 / 789                                                                                |
| Goodness-of-fit on <i>F</i> <sup>2</sup>                     | 1.027                                                                                           |
| Refinement Method                                            | Full-matrix least-squares on <i>F</i> <sup>2</sup>                                              |
| Final <i>R</i> indices [ <i>I</i> > 2 $\sigma$ ( <i>I</i> )] | <i>R</i> <sub>1</sub> = 0.0498, <i>wR</i> <sub>2</sub> = 0.1310                                 |
| <i>R</i> indices (all data)                                  | <i>R</i> <sub>1</sub> = 0.0605, <i>wR</i> <sub>2</sub> = 0.1394                                 |
| Largest diff. peak/hole (e. Å <sup>3</sup> )                 | 1.850/-1.194                                                                                    |

All crystal structure determinations were performed with a Bruker-Nonius X8 Kappa Apex2 diffractometer using MoK $\alpha$  radiation at a temperature of 110K. Suitable crystals of were selected under the microscope and mounted on MiTeGen mount using a minimum amount of Paratone N oil. Data were corrected for absorption and polarization effects using multi-scan methods (SADABS). The SQUEEZE procedure was implemented in PLATON in order to subtract out the solvent's contribution to the diffraction pattern. Structures were solved using direct methods. H atoms were placed at calculated positions and their isotropic displacement parameters refined as “riding” on the non-H atom to which they are bonded. Graphic representations of the resulting structure were produced using OLEX 2.

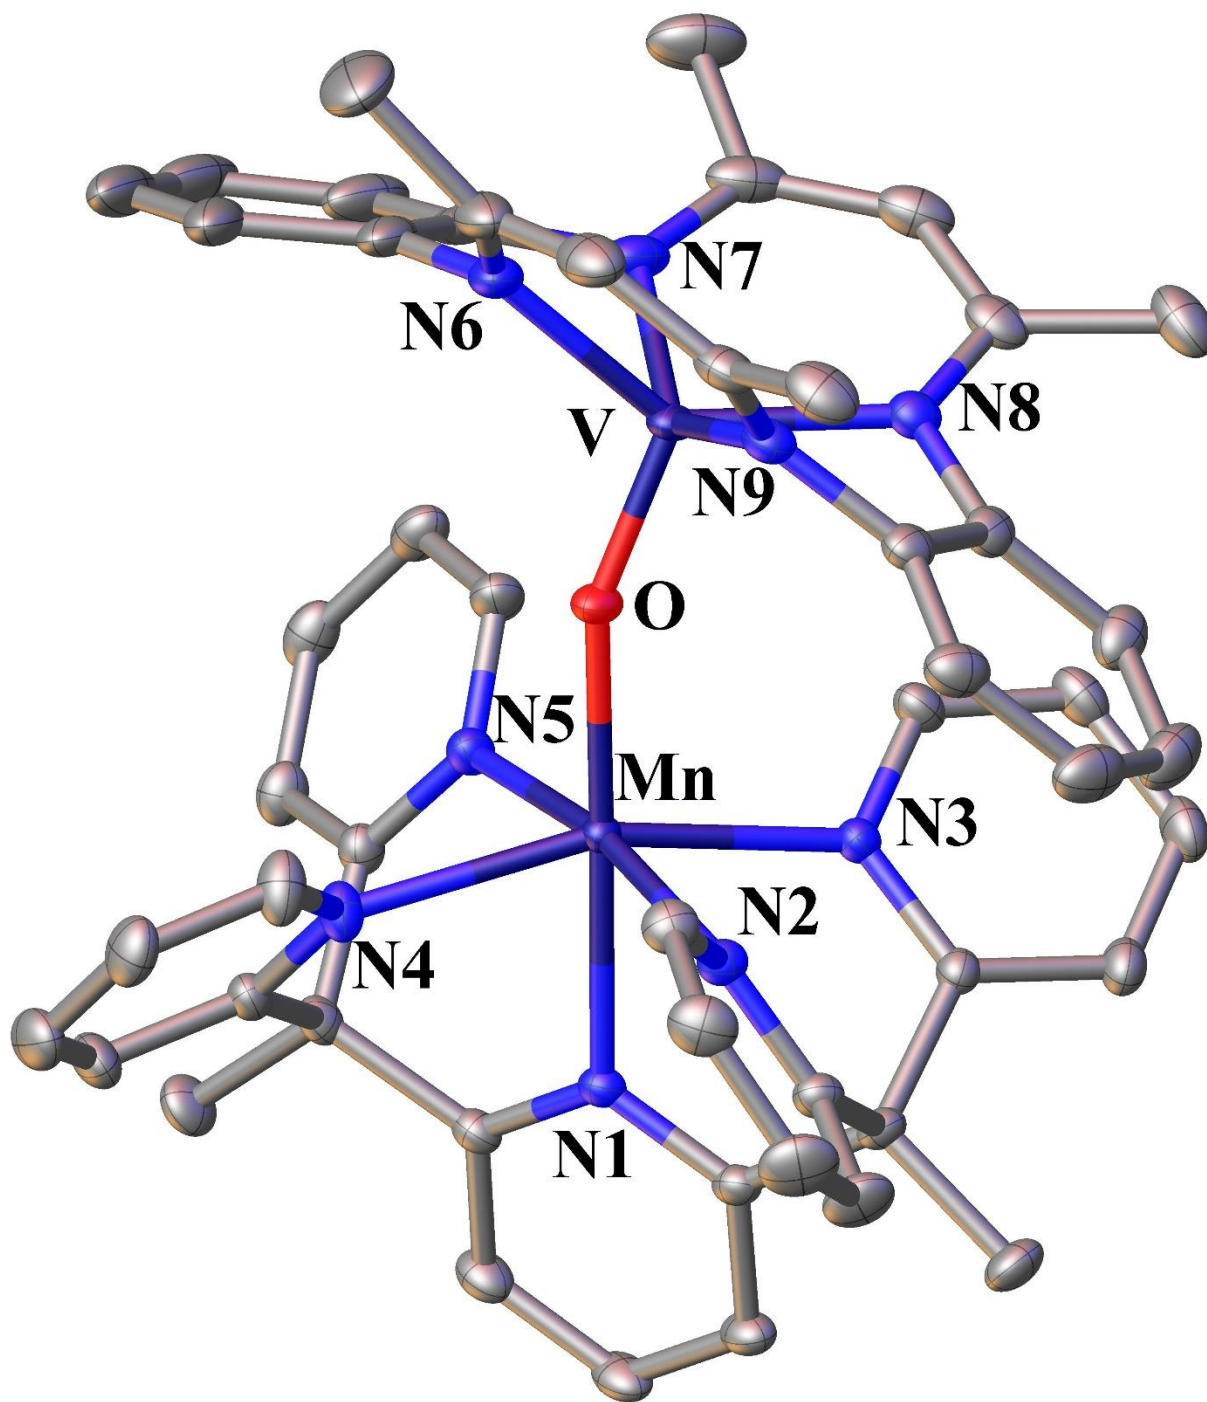

**Figure S34.** X-ray crystal structure of  $[(\text{TMTAA})\text{V}=\text{O} \rightarrow \text{Mn}(\text{Py}_5\text{Me}_2)]^{2+}$  (**3a**) with thermal ellipsoids drawn at the 50% probability level.

**Table S2.** Crystal data and structure refinement of **3b**.

|                                              |                                                                                                 |
|----------------------------------------------|-------------------------------------------------------------------------------------------------|
| Empirical formula                            | C <sub>53</sub> H <sub>49</sub> F <sub>6</sub> FeN <sub>9</sub> O <sub>8</sub> S <sub>2</sub> V |
| Formula weight                               | 1224.92                                                                                         |
| Temperature (K)                              | 110(2)                                                                                          |
| Wavelength (Å)                               | 0.71073                                                                                         |
| Crystal System                               | monoclinic                                                                                      |
| Space Group                                  | <i>P</i> 2 <sub>1</sub> / <i>n</i>                                                              |
| a (Å)                                        | 18.2672(11)                                                                                     |
| b (Å)                                        | 15.7643(10)                                                                                     |
| c (Å)                                        | 18.8744(11)                                                                                     |
| α (°)                                        | 90                                                                                              |
| β (°)                                        | 113.486(2)                                                                                      |
| γ (°)                                        | 90                                                                                              |
| Volume (Å <sup>3</sup> )                     | 5012.3(5)                                                                                       |
| Z                                            | 4                                                                                               |
| ρ <sub>calcd</sub> (g/cm <sup>3</sup> )      | 1.623                                                                                           |
| Absorption coefficient (mm <sup>-1</sup> )   | 0.650                                                                                           |
| F(000)                                       | 2516                                                                                            |
| Crystal Size (mm <sup>3</sup> )              | 0.036 × 0.338 × 0.407                                                                           |
| θ range for data collection (°)              | 1.31 to 23.82                                                                                   |
| Reflections collected                        | 58071                                                                                           |
| Independent reflections                      | 7711 [R <sub>int</sub> = 0.0499]                                                                |
| Data/restraints/parameters                   | 7711 / 0 / 730                                                                                  |
| Goodness-of-fit on F <sup>2</sup>            | 1.030                                                                                           |
| Refinement Method                            | Full-matrix least-squares on F <sup>2</sup>                                                     |
| Final R indices [I>2σ(I)]                    | R <sub>1</sub> = 0.0356, wR <sub>2</sub> = 0.0844                                               |
| R indices (all data)                         | R <sub>1</sub> = 0.0520, wR <sub>2</sub> = 0.0933                                               |
| Largest diff. peak/hole (e. Å <sup>3</sup> ) | 0.782/-0.529                                                                                    |

All crystal structure determinations were performed with a Bruker-Nonius X8 Kappa Apex2 diffractometer using MoKα radiation at a temperature of 110K. Suitable crystals of were selected under the microscope and mounted on MiTeGen mount using a minimum amount of Paratone N oil. Data were corrected for absorption and polarization effects using multi-scan methods (SADABS). The SQUEEZE procedure was implemented in PLATON in order to subtract out the solvent's contribution to the diffraction pattern. Structures were solved using direct methods. H atoms were placed at calculated positions and their isotropic displacement parameters refined as “riding” on the non-H atom to which they are bonded. Graphic representations of the resulting structure were produced using OLEX 2.

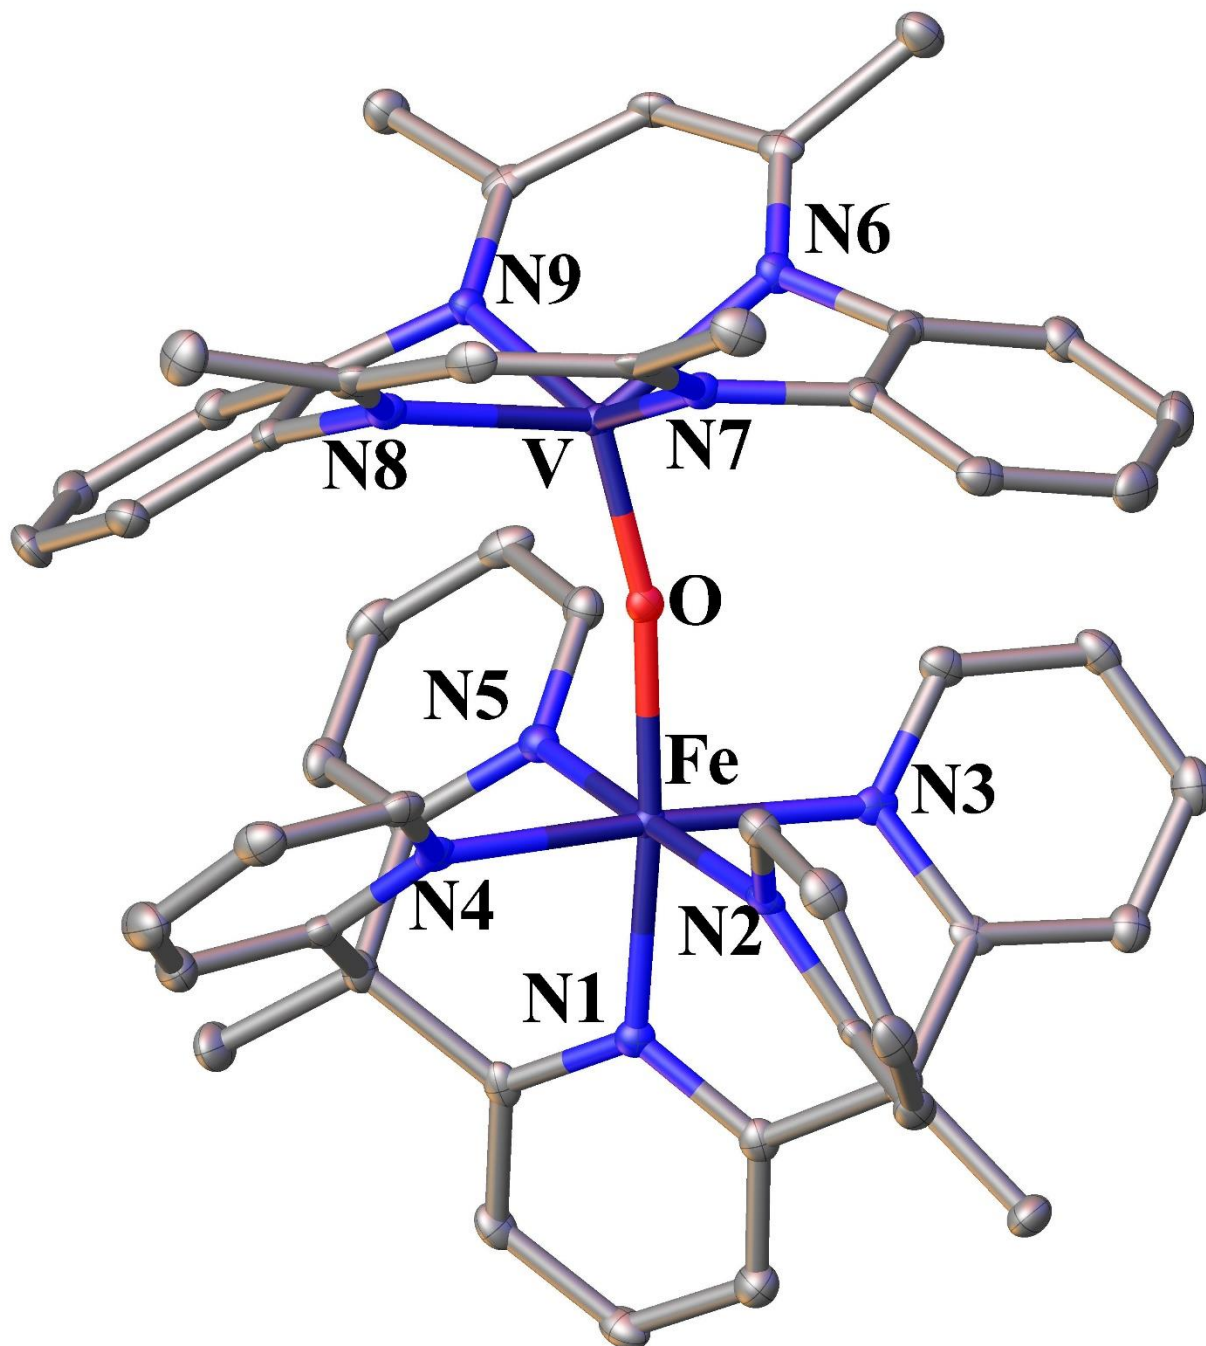

**Figure S35.** X-ray crystal structure of  $[(\text{TMTAA})\text{V}=\text{O} \rightarrow \text{Fe}(\text{Py}_5\text{Me}_2)]^{2+}$  (**3b**) with thermal ellipsoids drawn at the 50% probability level.

**Table S3.** Crystal data and structure refinement of **3c**.

|                                              |                                                                                                 |
|----------------------------------------------|-------------------------------------------------------------------------------------------------|
| Empirical formula                            | C <sub>53</sub> H <sub>49</sub> CoF <sub>6</sub> N <sub>9</sub> O <sub>8</sub> S <sub>2</sub> V |
| Formula weight                               | 1228.00                                                                                         |
| Temperature (K)                              | 110(2)                                                                                          |
| Wavelength (Å)                               | 0.71073                                                                                         |
| Crystal System                               | monoclinic                                                                                      |
| Space Group                                  | <i>P</i> 2 <sub>1</sub> / <i>n</i>                                                              |
| a (Å)                                        | 18.3347(11)                                                                                     |
| b (Å)                                        | 15.7616(10)                                                                                     |
| c (Å)                                        | 19.1765(12)                                                                                     |
| α (°)                                        | 90                                                                                              |
| β (°)                                        | 113.480(2)                                                                                      |
| γ (°)                                        | 90                                                                                              |
| Volume (Å <sup>3</sup> )                     | 5082.8(5)                                                                                       |
| Z                                            | 4                                                                                               |
| ρ <sub>calcd</sub> (g/cm <sup>3</sup> )      | 1.605                                                                                           |
| Absorption coefficient (mm <sup>-1</sup> )   | 0.681                                                                                           |
| F(000)                                       | 2520                                                                                            |
| Crystal Size (mm <sup>3</sup> )              | 0.052 × 0.207 × 0.486                                                                           |
| θ range for data collection (°)              | 1.30 to 25.36                                                                                   |
| Reflections collected                        | 61702                                                                                           |
| Independent reflections                      | 9302 [R <sub>int</sub> = 0.0567]                                                                |
| Data/restraints/parameters                   | 9302 / 0 / 730                                                                                  |
| Goodness-of-fit on F <sup>2</sup>            | 1.040                                                                                           |
| Refinement Method                            | Full-matrix least-squares on F <sup>2</sup>                                                     |
| Final R indices [I>2σ(I)]                    | R <sub>1</sub> = 0.0373, wR <sub>2</sub> = 0.0840                                               |
| R indices (all data)                         | R <sub>1</sub> = 0.0609, wR <sub>2</sub> = 0.0943                                               |
| Largest diff. peak/hole (e. Å <sup>3</sup> ) | 0.628/-0.459                                                                                    |

All crystal structure determinations were performed with a Bruker-Nonius X8 Kappa Apex2 diffractometer using MoKα radiation at a temperature of 110K. Suitable crystals of were selected under the microscope and mounted on MiTeGen mount using a minimum amount of Paratone N oil. Data were corrected for absorption and polarization effects using multi-scan methods (SADABS). The SQUEEZE procedure was implemented in PLATON in order to subtract out the solvent's contribution to the diffraction pattern. Structures were solved using direct methods. H atoms were placed at calculated positions and their isotropic displacement parameters refined as “riding” on the non-H atom to which they are bonded. Graphic representations of the resulting structure were produced using OLEX 2.

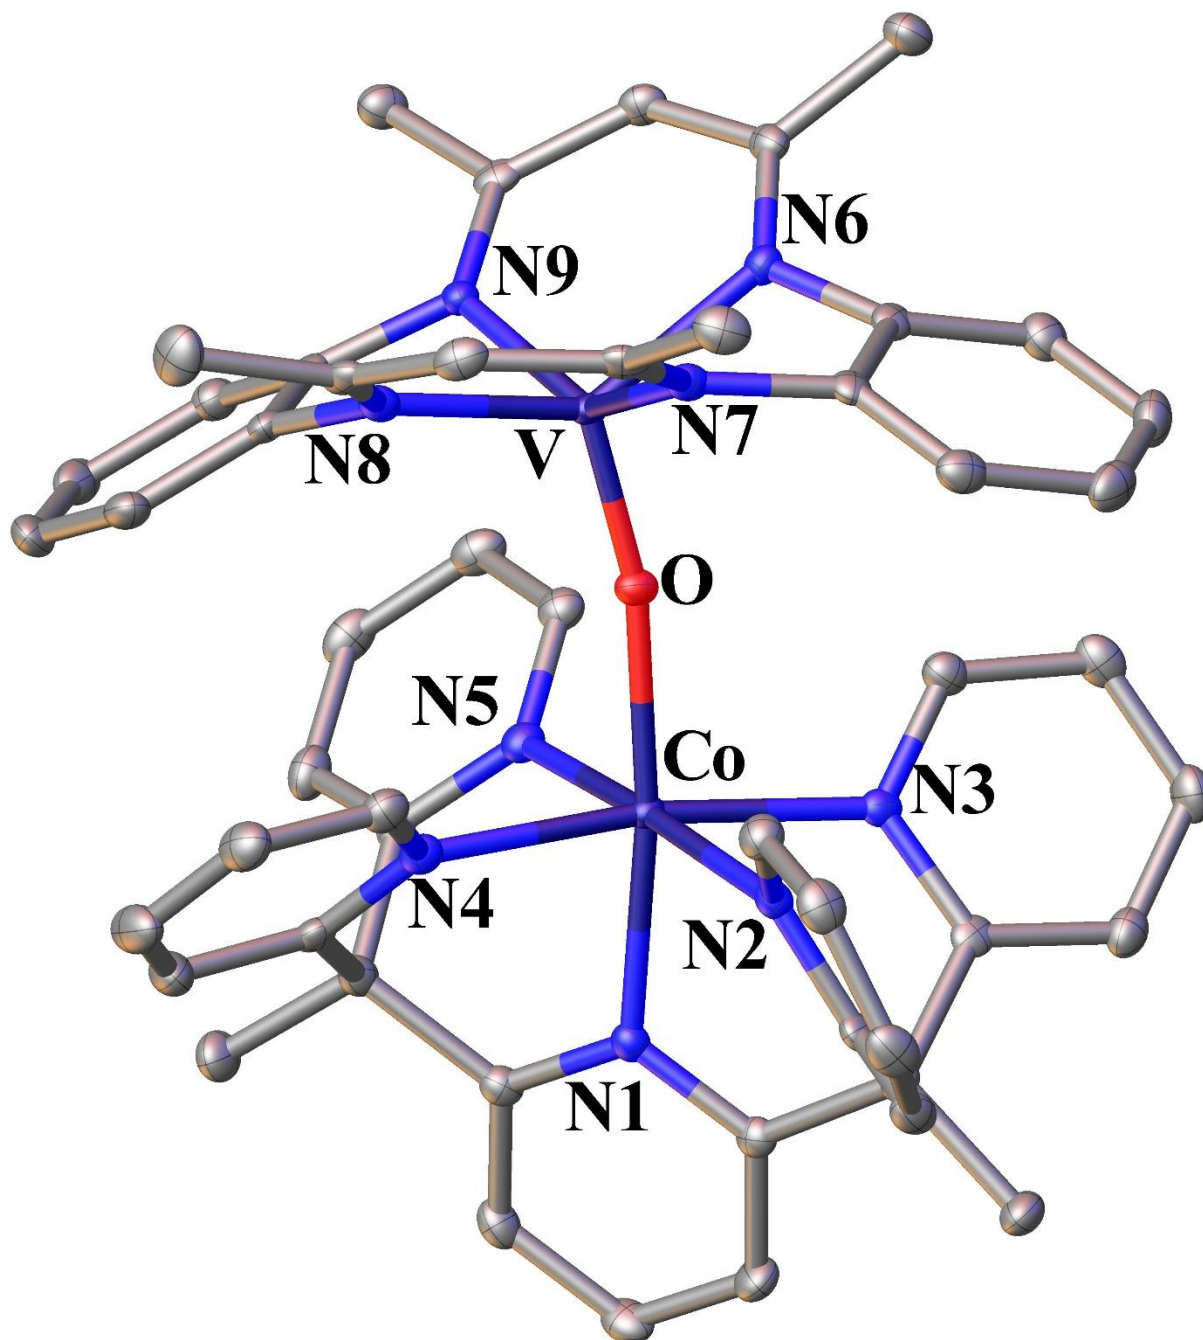

**Figure S36.** X-ray crystal structure of  $[(\text{TMTAA})\text{V}=\text{O} \rightarrow \text{Co}(\text{Py}_5\text{Me}_2)]^{2+}$  (**3c**) with thermal ellipsoids drawn at the 50% probability level.

**Table S4.** Crystal data and structure refinement of **3d**.

|                                              |                                                                                                 |
|----------------------------------------------|-------------------------------------------------------------------------------------------------|
| Empirical formula                            | C <sub>53</sub> H <sub>49</sub> F <sub>6</sub> N <sub>9</sub> NiO <sub>8</sub> S <sub>2</sub> V |
| Formula weight                               | 1227.78                                                                                         |
| Temperature (K)                              | 110(2)                                                                                          |
| Wavelength (Å)                               | 0.71073                                                                                         |
| Crystal System                               | monoclinic                                                                                      |
| Space Group                                  | <i>P</i> 2 <sub>1</sub> / <i>n</i>                                                              |
| a (Å)                                        | 18.3482(6)                                                                                      |
| b (Å)                                        | 15.7837(4)                                                                                      |
| c (Å)                                        | 19.1046(6)                                                                                      |
| α (°)                                        | 90                                                                                              |
| β (°)                                        | 113.556(2)                                                                                      |
| γ (°)                                        | 90                                                                                              |
| Volume (Å <sup>3</sup> )                     | 5071.7(3)                                                                                       |
| Z                                            | 4                                                                                               |
| ρ <sub>calcd</sub> (g/cm <sup>3</sup> )      | 1.608                                                                                           |
| Absorption coefficient (mm <sup>-1</sup> )   | 0.727                                                                                           |
| F(000)                                       | 2524                                                                                            |
| Crystal Size (mm <sup>3</sup> )              | 0.050 × 0.260 × 0.272                                                                           |
| θ range for data collection (°)              | 1.30 to 25.68                                                                                   |
| Reflections collected                        | 60975                                                                                           |
| Independent reflections                      | 9624 [R <sub>int</sub> = 0.0487]                                                                |
| Data/restraints/parameters                   | 9624 / 754 / 733                                                                                |
| Goodness-of-fit on F <sup>2</sup>            | 1.013                                                                                           |
| Refinement Method                            | Full-matrix least-squares on F <sup>2</sup>                                                     |
| Final R indices [I>2σ(I)]                    | R <sub>1</sub> = 0.0336, wR <sub>2</sub> = 0.0744                                               |
| R indices (all data)                         | R <sub>1</sub> = 0.0541, wR <sub>2</sub> = 0.0825                                               |
| Largest diff. peak/hole (e. Å <sup>3</sup> ) | 0.673/-0.432                                                                                    |

All crystal structure determinations were performed with a Bruker-Nonius X8 Kappa Apex2 diffractometer using MoKα radiation at a temperature of 110K. Suitable crystals of were selected under the microscope and mounted on MiTeGen mount using a minimum amount of Paratone N oil. Data were corrected for absorption and polarization effects using multi-scan methods (SADABS). The SQUEEZE procedure was implemented in PLATON in order to subtract out the solvent's contribution to the diffraction pattern. Structures were solved using direct methods. H atoms were placed at calculated positions and their isotropic displacement parameters refined as “riding” on the non-H atom to which they are bonded. Graphic representations of the resulting structure were produced using OLEX 2.

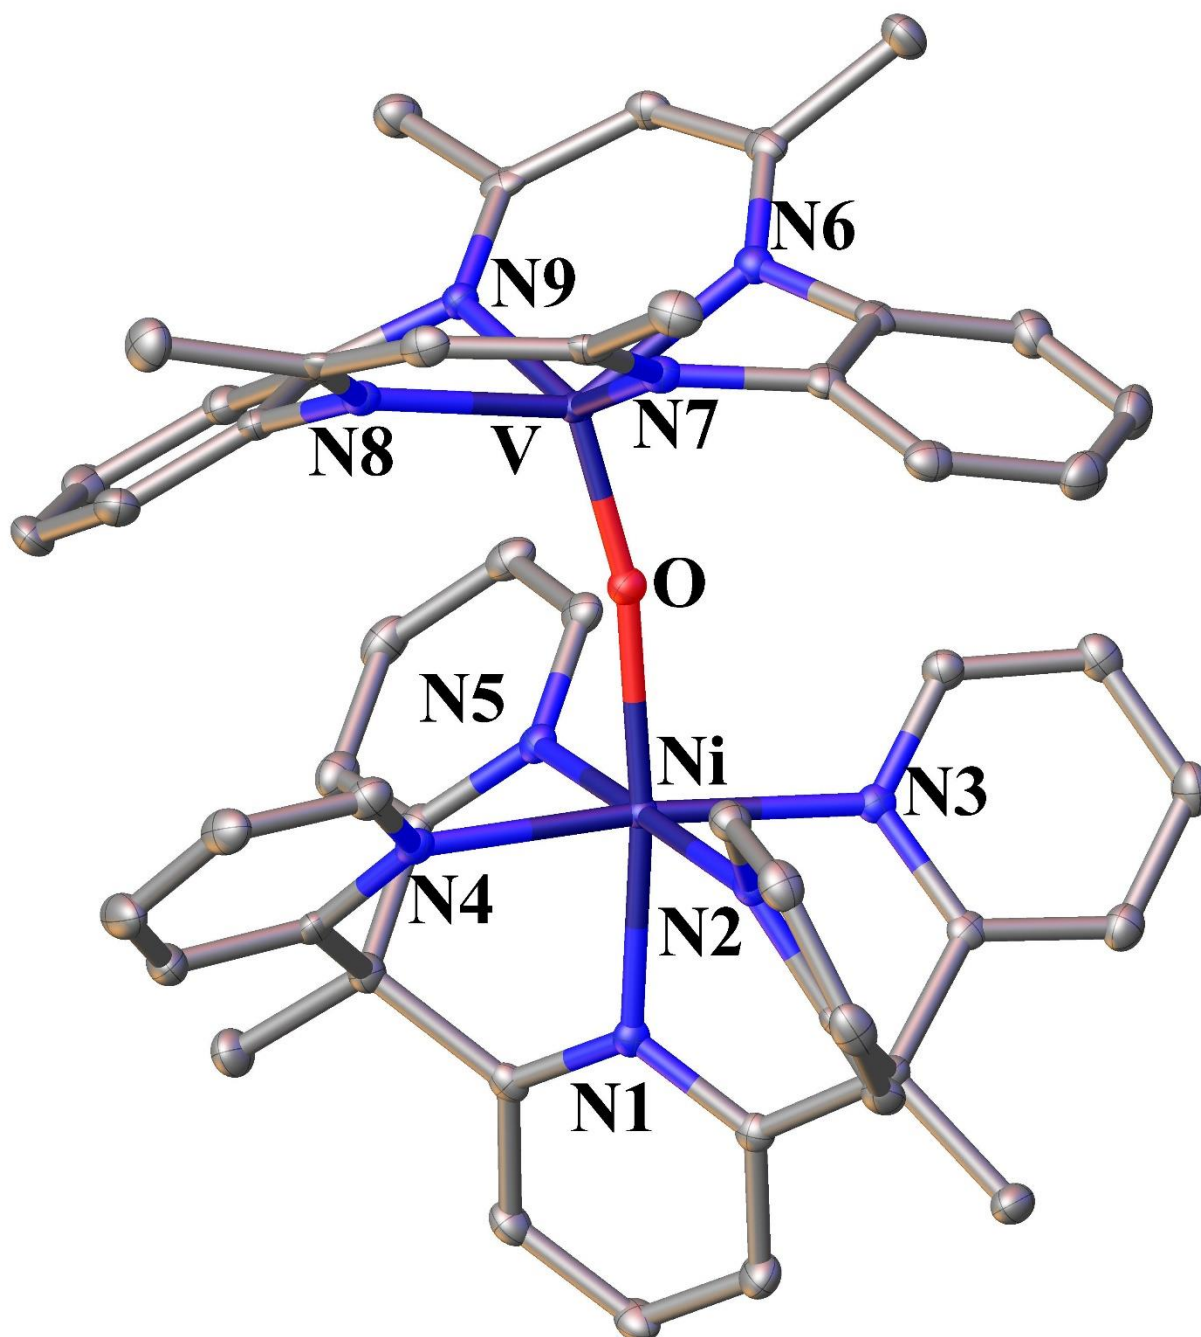

**Figure S37.** X-ray crystal structure of  $[(\text{TMTAA})\text{V}=\text{O} \rightarrow \text{Ni}(\text{Py}_5\text{Me}_2)]^{2+}$  (**3d**) with thermal ellipsoids drawn at the 50% probability level.



**Table S5.** Crystal data and structure refinement of **3e**.

|                                              |                                                                                                 |
|----------------------------------------------|-------------------------------------------------------------------------------------------------|
| Empirical formula                            | C <sub>53</sub> H <sub>47</sub> F <sub>6</sub> N <sub>9</sub> CuO <sub>7</sub> S <sub>2</sub> V |
| Formula weight                               | 1214.59                                                                                         |
| Temperature (K)                              | 110(2)                                                                                          |
| Wavelength (Å)                               | 0.71073                                                                                         |
| Crystal System                               | monoclinic                                                                                      |
| Space Group                                  | <i>P</i> 2 <sub>1</sub> / <i>n</i>                                                              |
| a (Å)                                        | 18.0595(7)                                                                                      |
| b (Å)                                        | 15.3356(6)                                                                                      |
| c (Å)                                        | 20.4359(8)                                                                                      |
| α (°)                                        | 90                                                                                              |
| β (°)                                        | 113.311(2)                                                                                      |
| γ (°)                                        | 90                                                                                              |
| Volume (Å <sup>3</sup> )                     | 5197.8(4)                                                                                       |
| Z                                            | 4                                                                                               |
| ρ <sub>calcd</sub> (g/cm <sup>3</sup> )      | 1.552                                                                                           |
| Absorption coefficient (mm <sup>-1</sup> )   | 0.754                                                                                           |
| F(000)                                       | 2488                                                                                            |
| Crystal Size (mm <sup>3</sup> )              | 0.200 × 0.220 × 0.240                                                                           |
| θ range for data collection (°)              | 1.28 to 31.51                                                                                   |
| Reflections collected                        | 90561                                                                                           |
| Independent reflections                      | 17326 [R <sub>int</sub> = 0.0314]                                                               |
| Data/restraints/parameters                   | 17326 / 0 / 718                                                                                 |
| Goodness-of-fit on F <sup>2</sup>            | 1.032                                                                                           |
| Refinement Method                            | Full-matrix least-squares on F <sup>2</sup>                                                     |
| Final R indices [I>2σ(I)]                    | R <sub>1</sub> = 0.0411, wR <sub>2</sub> = 0.1113                                               |
| R indices (all data)                         | R <sub>1</sub> = 0.0553, wR <sub>2</sub> = 0.1204                                               |
| Largest diff. peak/hole (e. Å <sup>3</sup> ) | 2.579/-1.115                                                                                    |

All crystal structure determinations were performed with a Bruker-Nonius X8 Kappa Apex2 diffractometer using MoK $\alpha$  radiation at a temperature of 110K. Suitable crystals of were selected under the microscope and mounted on MiTeGen mount using a minimum amount of Paratone N oil. Data were corrected for absorption and polarization effects using multi-scan methods (SADABS). The SQUEEZE procedure was implemented in PLATON in order to subtract out the solvent's contribution to the diffraction pattern. Structures were solved using direct methods. H atoms were placed at calculated positions and their isotropic displacement parameters refined as “riding” on the non-H atom to which they are bonded. Graphic representations of the resulting structure were produced using OLEX 2.

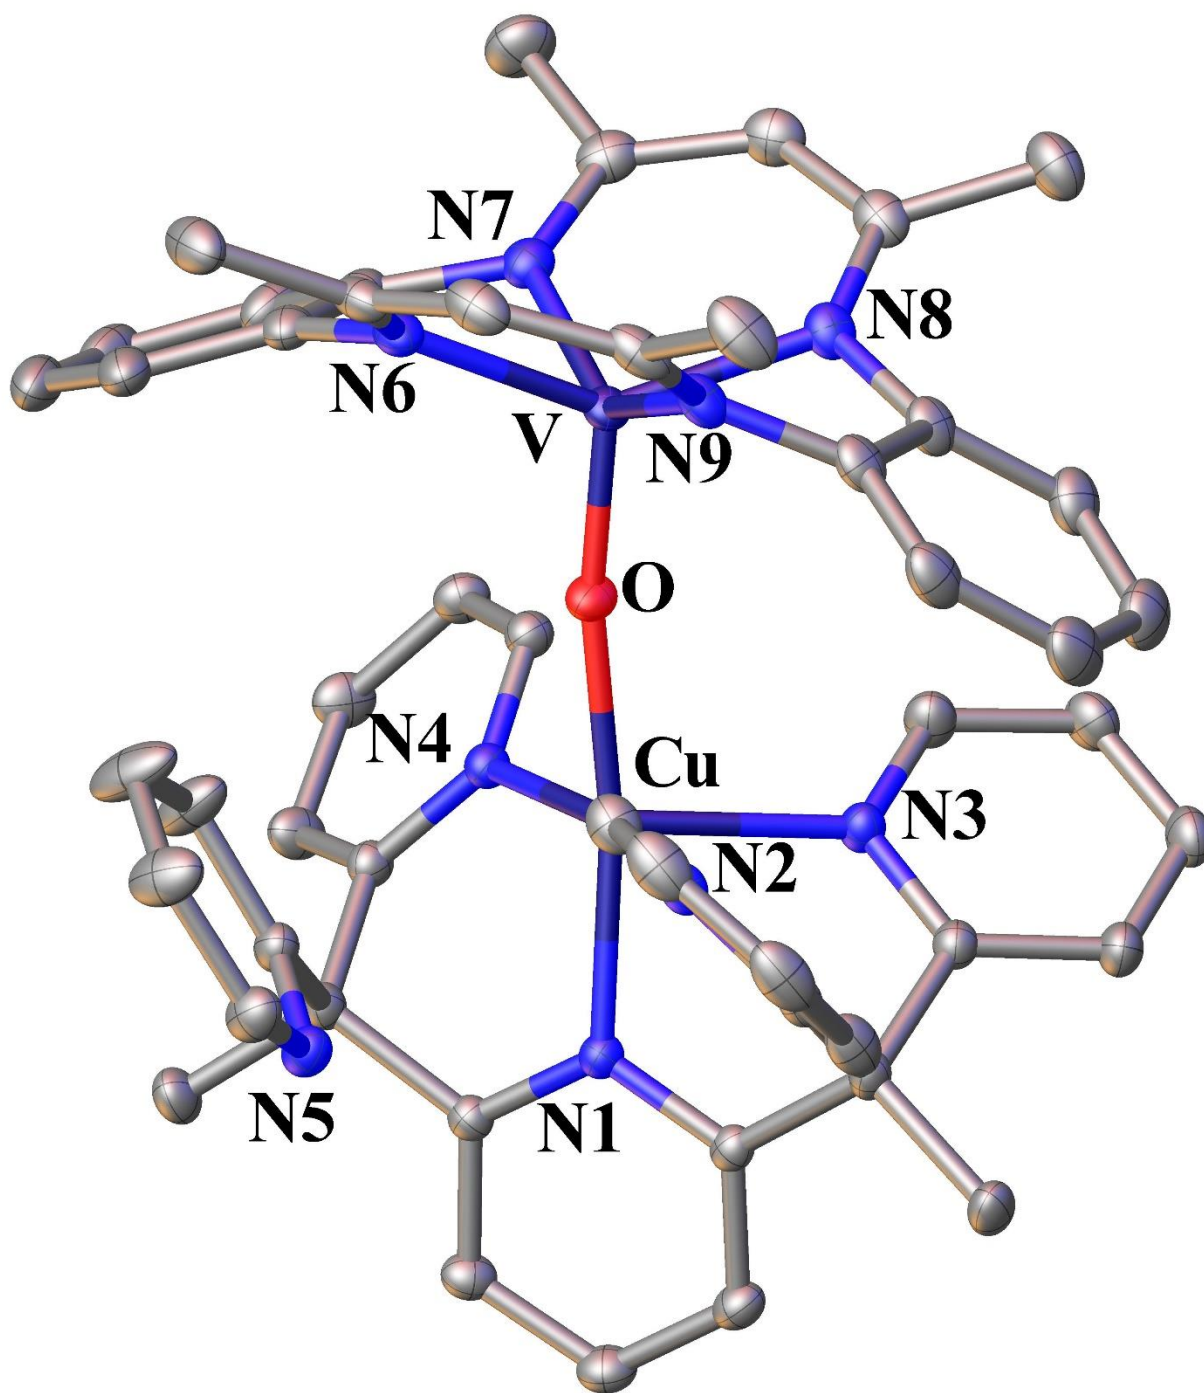

**Figure S38.** X-ray crystal structure of  $[(\text{TMTAA})\text{V}=\text{O} \rightarrow \text{Cu}(\text{Py}_5\text{Me}_2)]^{2+}$  (**3e**) with thermal ellipsoids drawn at the 50% probability level.

## Electrochemical Experiments

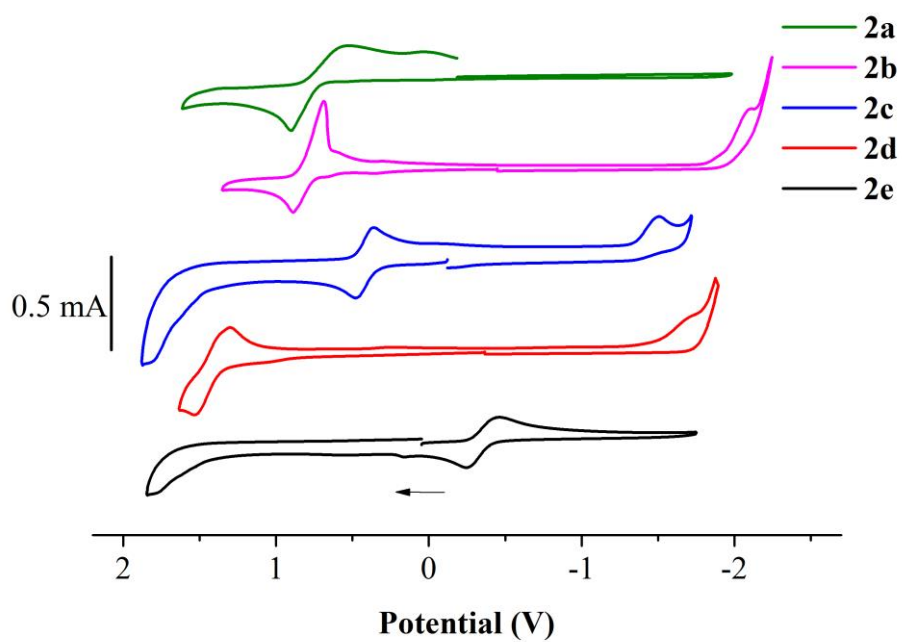

**Figure S39.** Cyclic voltammograms of **2a-e** in dry dichloromethane under the protection of nitrogen. All signals are referenced to Fc/Fc<sup>+</sup> (0 V).

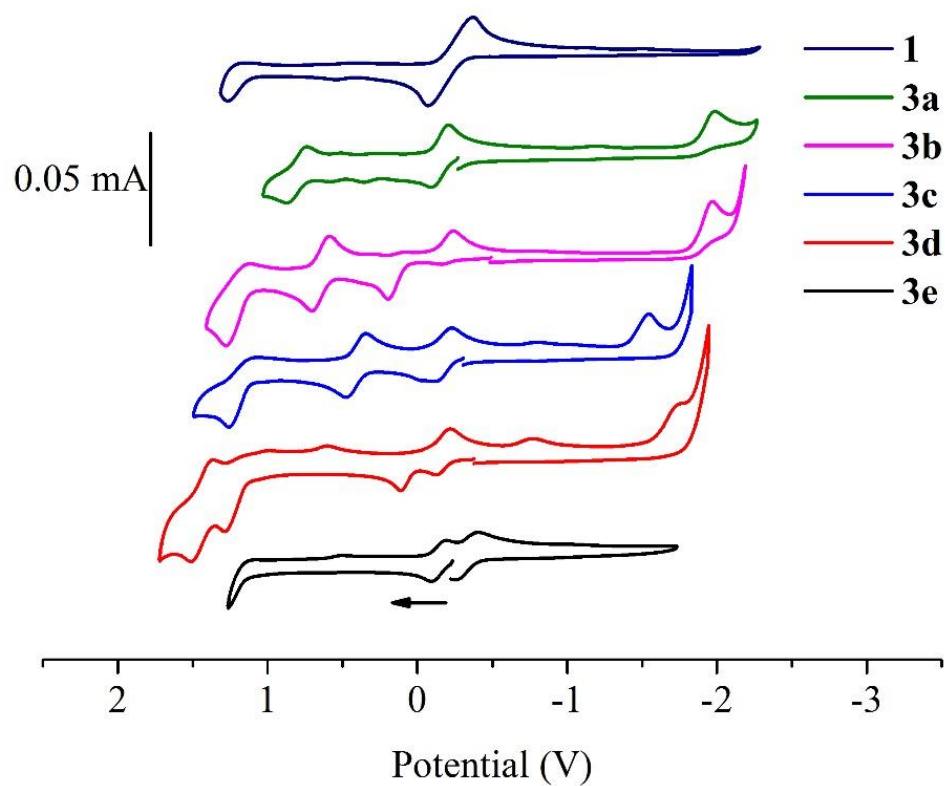

**Figure S40.** Cyclic voltammograms of **3a-e** in dry dichloromethane under the protection of nitrogen. All signals are referenced to Fc/Fc<sup>+</sup> (0 V).

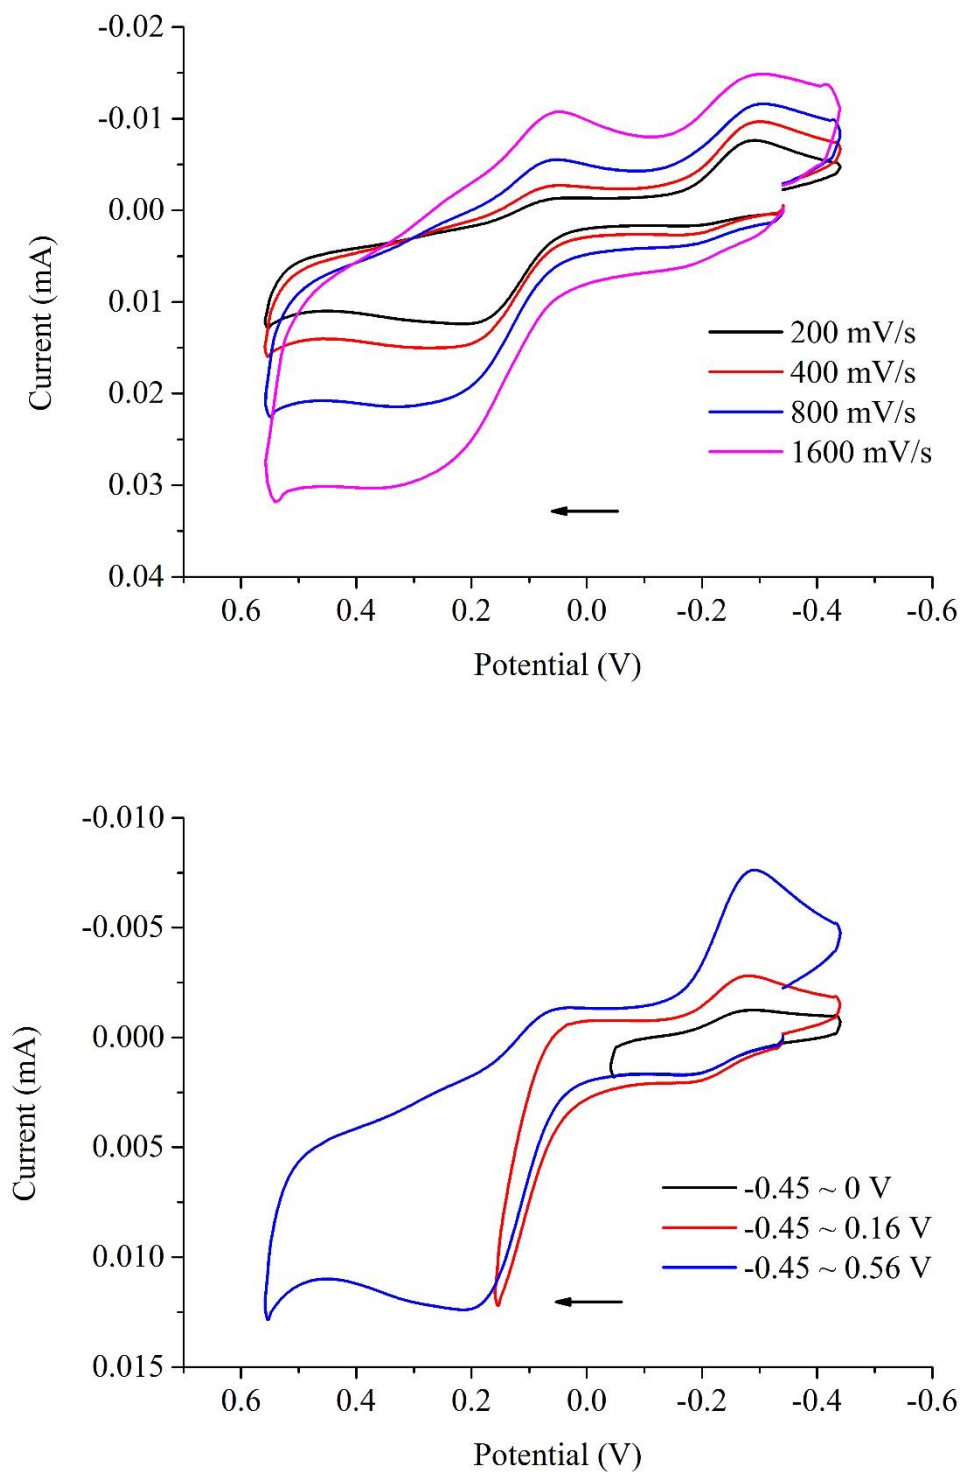

**Figure S41.** Scan rate study (above) and variable potential scan study (below) on  $[(\text{TMTAA})\text{V}=\text{O} \rightarrow \text{Fe}(\text{Py}_5\text{Me}_2)](\text{CF}_3\text{SO}_3)_2$  (**3b**).

## Resonance Raman Measurements

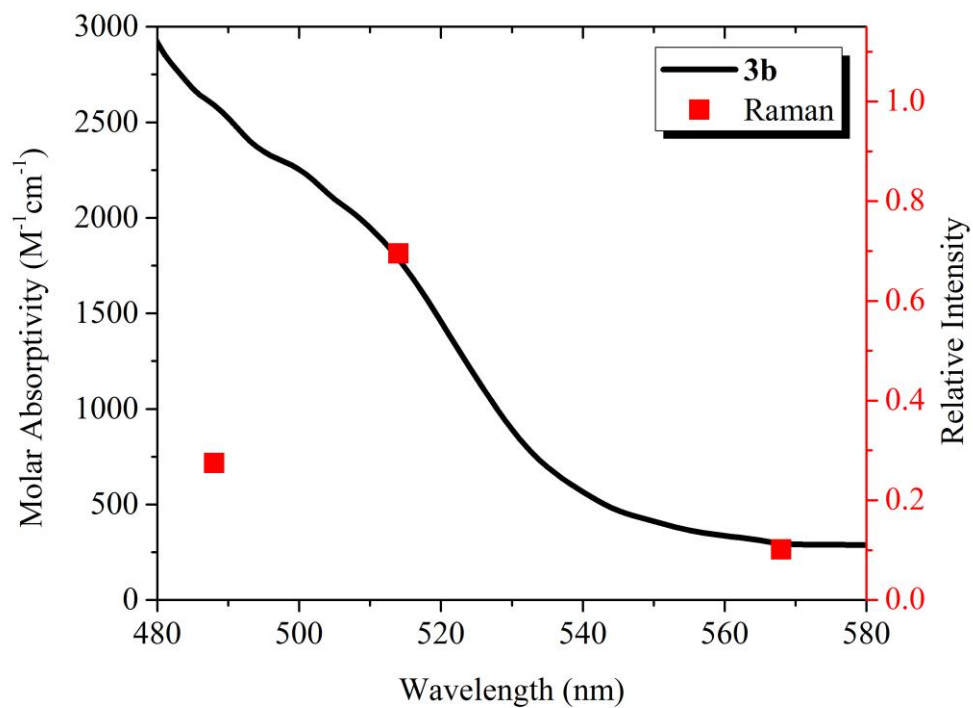

**Figure S42.** Resonance Raman enhancement profile (dot) overlayed with the EAS spectrum of **3b** (solid curve).

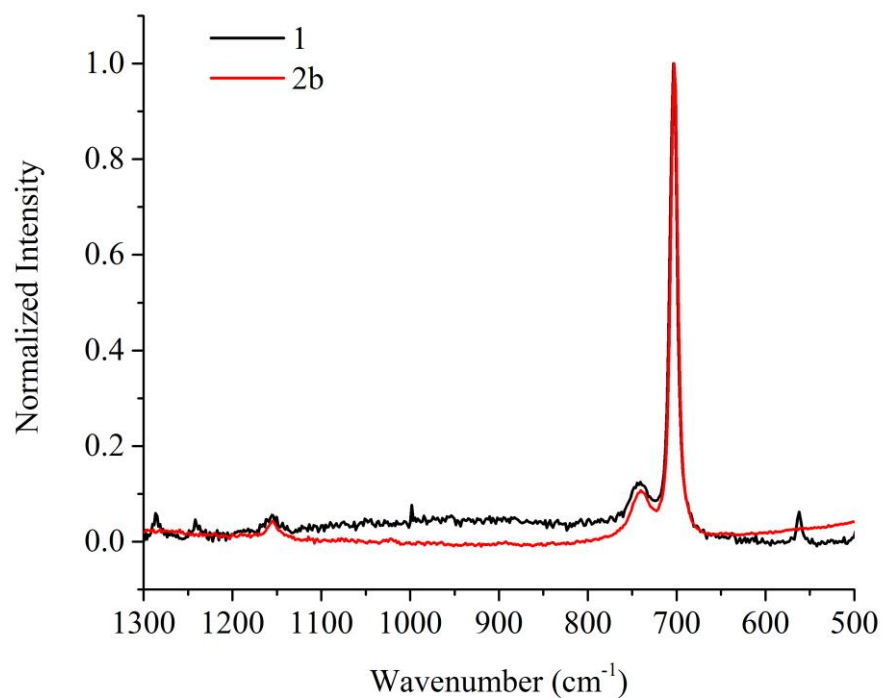

**Figure S43.** Resonance Raman spectra of **1** and **2b** in dichloromethane. Wavelength and intensity was referenced and normalized to the rRaman signal of dichloromethane at 703 cm<sup>-1</sup>. Note the absence of any resonance enhanced peak at ~ 900 cm<sup>-1</sup>.
